1 **Nicotinic acetylcholine receptor partial antagonist polyamides from**  
2 **tunicates and their predatory sea slugs**

3  
4 Noemi D. Paguigan<sup>1</sup>, Jortan O. Tun<sup>2</sup>, Lee S. Leavitt<sup>2</sup>, Zhenjian Lin<sup>1</sup>, Kevin Chase<sup>1</sup>, Cheryl Dowell<sup>1</sup>, Cas-  
5 sandra E. Deering-Rice<sup>3</sup>, Albebson L. Lim<sup>1</sup>, Manju Karthikeyan<sup>1</sup>, Ronald W. Huguen<sup>4</sup>, Jie Zhang<sup>4</sup>, Ran-  
6 dall T. Peterson<sup>3</sup>, Christopher A. Reilly<sup>3</sup>, Alan R. Light<sup>4</sup>, Shrinivasan Raghuraman<sup>2</sup>, J. Michael McIn-  
7 tosh<sup>2,5,6</sup>, Baldomero M. Olivera<sup>2</sup>, Eric W. Schmidt<sup>1\*</sup>

8  
9 <sup>1</sup>Department of Medicinal Chemistry, University of Utah, Salt Lake City, Utah, 81112, USA; <sup>2</sup>School of  
10 Biological Sciences, University of Utah, Salt Lake City, Utah 84112, USA; <sup>3</sup>Department of Pharmacology  
11 and Toxicology, University of Utah, Salt Lake City, Utah, 81112, USA; <sup>4</sup>Department of Anesthesiology,  
12 School of Medicine, University of Utah, Salt Lake City, Utah 84112, USA; <sup>5</sup>Department of Psychiatry,  
13 University of Utah, Salt Lake City, Utah 84112, USA; <sup>6</sup>George E Whalen Veterans Affairs Medical Center,  
14 Salt Lake City, Utah 84148, USA

15  
16 \*Correspondence: [ews1@utah.edu](mailto:ews1@utah.edu)

17  
18  
19  
20  
21  
22  
23  
24

25 **ABSTRACT**

26 In our efforts to discover new drugs to treat pain, we identified molleamines A-E (**1-5**) as major neuroactive  
27 components of the sea slug, *Pleurobranchus forskalii* and their prey, *Didemnum molle* tunicates. The chem-  
28 ical structures of molleamines were elucidated by spectroscopy and confirmed by the total synthesis of  
29 molleamines A (**1**) and C (**3**). Synthetic **3** completely blocked acetylcholine-induced calcium flux in pep-  
3 0 tidergic nociceptors (PNs) in the somatosensory nervous system. Compound **3** affected neither the  $\alpha 7$  nA-  
3 1 ChR nor the muscarinic acetylcholine receptors in calcium flux assays. In addition to nociceptors, **3** partially  
3 2 blocked the acetylcholine-induced calcium flux in the sympathetic nervous system, including neurons from  
3 3 the superior cervical ganglion. Electrophysiology revealed a block of  $\alpha 3\beta 4$  (mouse) and  $\alpha 6/\alpha 3\beta 4$  (rat) nic-  
3 4 otinic acetylcholine receptors (nAChRs), with  $IC_{50}$  values of 1.4 and 3.1  $\mu M$ , respectively. Molleamine C  
3 5 (**3**) is a partial antagonist, reaching a maximum block of 76-82% of the acetylcholine signal and showing  
3 6 no partial agonist response. Molleamine C (**3**) may thus provide a lead compound for the development of  
3 7 neuroactive compounds with unique biological properties.

3 8

3 9

4 0

4 1

4 2

4 3

4 4

4 5

4 6

4 7

4 8

4 9

## 5 0 INTRODUCTION

5 1 Mollusks often use small molecules or peptides in defense, predation, and signaling. Cone snails, for ex-  
5 2 ample, inject into prey animals a potent venom that has led to many drug candidates and an FDA-approved  
5 3 pain therapy (*Bjørn-Yoshimoto, et al., 2020*). Beyond cone snails, the neurochemical diversity of mollusks  
5 4 has been relatively unexplored, prompting us to conduct a screening campaign that led to the discovery of  
5 5 mollusk compounds with potential to combat the opioid crisis (*Volkow and McLellan, 2016*). We performed  
5 6 phenotypic screen using the mouse dorsal root ganglion (DRG), where peripheral neurons detecting pain,  
5 7 heat, cold, touch, limb position, and other sensory modalities are bundled. Each of these sensations is sig-  
5 8 naled by several cell types each expressing complex constellation of receptors and ion channels. We applied  
5 9 constellation pharmacology to determine the cell-type selectivity of compounds in a single assay and to  
6 0 rapidly focus on compounds that selectively target nociceptors or other desired sensory cell types. Constel-  
6 1 lation pharmacology also enables the identification of potential molecular targets that are relevant to disease  
6 2 progression (*Raghuraman, et al., 2020; Teichert, et al., 2014; Teichert, et al., 2015; Teichert, et al., 2012*).

6 3 Pleurobranchs are a family of mollusks that are well known for neuroactive compounds: tetrodotoxin  
6 4 was isolated from *Pleurobranchus maculata* (*Wood, et al., 2012*), while an ergot alkaloid was isolated from  
6 5 *Pleurobranchus forskalii* (*Wakimoto, et al., 2013*). Here, we describe a class of potential antinociceptive  
6 6 compounds isolated from the sea slug *P. forskalii* from the Solomon Islands. Like other mollusks from  
6 7 Family Pleurobranchidae, *P. forskalii* has a greatly reduced shell and copious unprotected tissues that may  
6 8 require a chemical defense. It is a nocturnal animal that preys on tunicates, especially *Didemnum molle*. *P.*  
6 9 *forskalii* accumulates typical *D. molle* metabolites, including macrocyclic cyanobactin peptides and diter-  
7 0 penes, presumably from the diet (*Tan, et al., 2013; Wesson and Hamann, 1996*). The compounds are toxic,  
7 1 leading to a proposed role in chemical defense. While defensive metabolites are well studied in many spe-  
7 2 cies of shell-less mollusks (*Cimino and Ghiselin, 2009*), to the best of our knowledge the ecological roles  
7 3 of natural products in pleurobranchs have not been experimentally tested. Here, we show that *P. forskalii*  
7 4 obtained from the Solomon Islands contains molleamines, small molecules that are structurally related to

7 5 the previously described mollecarbamate/molleurea class of alkaloid natural products (*Issac, et al., 2017;*  
7 6 *Lu, et al., 2012*). Using metabolomics, we show that molleamines and their structural relatives are ubiqui-  
7 7 tously found in *D. molle* tunicates throughout the region where the *P. forskalii* sample was collected, while  
7 8 they were absent from other tunicates from the Family Didemnidae, reinforcing the dietary origin of the  
7 9 compounds.

8 0 In constellation pharmacology assays, molleamine C (**3**) displayed selective activity in blocking the ac-  
8 1 etylcholine induced calcium influx in a subset of peptidergic nociceptors (PNs), as well as an additional  
8 2 activity in A $\delta$ -low threshold mechanoreceptors (LTMRs) at higher doses. These neurons are directly rele-  
8 3 vant to pain sensation. Mechanistic investigations show that the major activity of **3** is due to partial antag-  
8 4 onism of the major  $\alpha$ 3 and  $\alpha$ 6 nicotinic acetylcholine receptors (nAChRs) that are specifically present in  
8 5 those cells. While there are many nAChR agonists and antagonists, the only other selective partial antago-  
8 6 nist of  $\alpha$ 3 nAChRs (AT-1001) is also a partial agonist. Molleamine C (**3**) may thus provide a new lead for  
8 7 neuroactive drug discovery.

8 8

## 8 9 **RESULTS**

### 9 0 **Isolation and characterization of neuroactive molleamines**

9 1 *P. forskalii* was collected at night at Lomousa Reef, Solomon Islands (S 09° 08' 42.33" E 159° 06' 01.50).  
9 2 *D. molle* specimens SI-074U, -075W, -123K, -124L, -128T, -222K, -223L, -226S, -228U, -382U, -386H, -  
9 3 389MA, -389MB, -457S, -462Y, -463H, -464K, -465L, -485H, and -486K were collected near the Russell  
9 4 Islands and Honiara Island, Solomon Islands. The cytochrome oxidase I gene sequence confirmed the field  
9 5 identification (deposited in GenBank, MW663488). The *P. forskalii* ethanolic extract was potently active  
9 6 in a DRG assay, in particular blocking the effects of ATP on a subset of neurons. Assay-guided fractionation  
9 7 afforded five compounds, the molleamines, that were responsible for the observed activity.

9 8

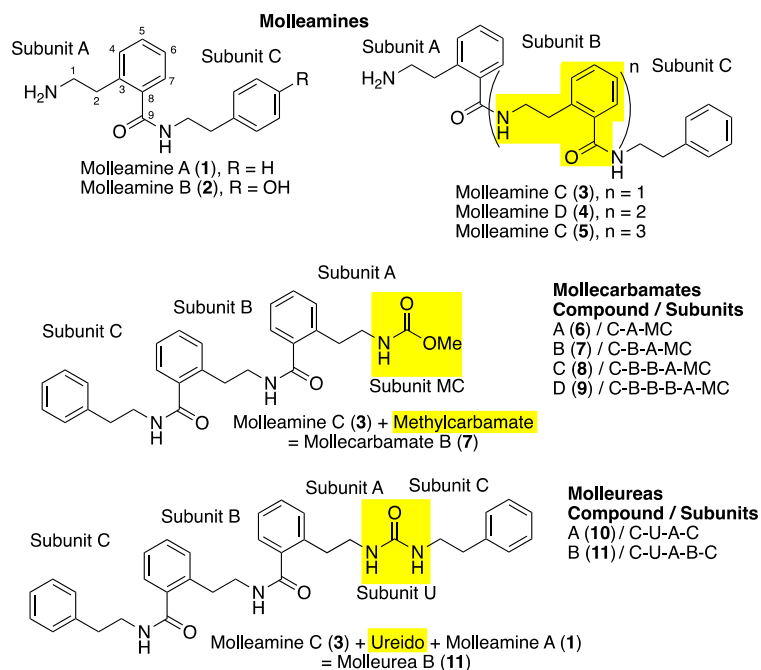

9 9

10 0 **Figure 1.** Molleamines isolated from the shell-less mollusk *P. forskalii*, compared with previously identified mollecarbamates and molleureas from *P. forskalii*'s prey organism, the tunicate *D. molle*. All compounds contain a repeating  
10 1  
10 2 2-(2-aminoethyl)benzoic acid (AEBA) moiety (subunits A and B), capped with phenylethylamine or hydroxylphenylethylamine (subunit C). Highlighting shows characteristic features that define each compound class.  
10 3  
10 4 With 34 supplements (**Figure supplement 1-33, Table supplement 1**).

10 5

10 6 Molleamine A (1) was isolated as an amorphous, colorless solid with a molecular formula of  $C_{17}H_{20}N_2O$ ,  
10 7 indicating nine degrees of unsaturation, as determined by HRMS and NMR data. The  $^1H$  NMR spectrum  
10 8 of 1 indicated the presence of an amide group ( $\delta_H$  8.55), an amine ( $\delta_H$  7.84), four methylenes, and nine  
10 9 aromatic protons.  $^{13}C$  and HSQC NMR data were consistent with the above units, which together accounted  
11 0 for all unsaturations. COSY and HMBC correlations from H-2 to C-8 and C-3 (Subunit A), H-4 to C-2  
11 1 (Subunit A), and H-2 to C-3, C-4 (Subunit C) and H-8 to C-2 (Subunit C) enabled assembly of phenethylamine and 2-(2-aminoethyl)benzoic acid (AEBA) moieties (**Figure 1, Figure 1-figure supplement 1**).  
11 2  
11 3 MS/MS data provided evidence that these two moieties were connected (**Figure 1-figure supplement 5**),  
11 4 and chemical synthesis of 1 from commercially available starting units confirmed the assignment.

115 Molleamine B (**2**) differed from **1** by an oxygenation. This difference could be explained by a pair of *ortho*-  
116 coupled aromatic doublets ( $\delta_{\text{H}}$  7.84 and  $\delta_{\text{H}}$  6.70) and a phenolic OH signal at  $\delta_{\text{H}}$  9.21, indicating that the  
117 phenyl group in **1** was oxygenated in **2**, forming a *p*-hydroxyphenyl moiety. All NMR and MS data were  
118 consistent with this assignment.

119 Molleamine C (**3**) was isolated as an amorphous colorless solid with a molecular formula of  $\text{C}_{26}\text{H}_{29}\text{N}_3\text{O}_2$ ,  
120 indicating 14 degrees of unsaturation. In comparison to **1**, **3** incorporated nine more carbon atoms, nine  
121 more hydrogen atoms, one more nitrogen atom, and one more oxygen atom. The  $^1\text{H}$  NMR spectrum of **3**  
122 revealed two amide protons ( $\delta_{\text{H}}$  8.68 and  $\delta_{\text{H}}$  8.46), an amine ( $\delta_{\text{H}}$  7.88), 13 overlapping aromatic protons ( $\delta_{\text{H}}$   
123 7.2-7.4), and six methylene groups ( $\delta_{\text{H}}$  2.84 -  $\delta_{\text{H}}$  3.47). The  $^{13}\text{C}$  NMR and HSQC data of compound **3**  
124 indicated the presence of two amide carbonyls, 18 aromatic carbons, and six methylenes. COSY and HMBC  
125 correlations from the above structural units supported one phenethylamine and two AEBA units. Key  
126 HMBC correlations from H-7 (subunit A) and H-1 (subunit B1) to amide carbonyl C-9 (subunit A), and  
127 from H-7 (subunit B1) and H-1 (subunit C) to amide carbonyl C-9 (subunit B1) allowed connection of the  
128 subunits as shown (**Figure 1-figure supplement 1**). The MS/MS fragment ions  $m/z$  105,  $m/z$  148,  $m/z$  252,  
129 which were comparable to those of **1**, and new fragments  $m/z$  269 and  $m/z$  399 (**Figure 1-figure supplement**  
13 0 **13**) supported the link between these moieties. Finally, because of the limited quantities available for phar-  
13 1 macological testing, we performed a gram-scale total synthesis of **3** from commercially available starting  
13 2 material. Spectroscopic data and coelution of the natural and synthetic products under several different  
13 3 conditions proved the identity of the synthetic and natural materials, and thus confirmed the structure of **3**  
13 4 as assigned (**Figure 1-figure supplement 26-29**).

13 5 Molleamines C (**4**) and D (**5**) were similarly elucidated, the differences being extension by one and two  
13 6 additional AEBA units, respectively. The assignments of **4** and **5** were supported by extensive NMR and  
13 7 MS data. The only exception was that the limited quantity available for **5** made it difficult to obtain a clear  
13 8  $^{13}\text{C}$  NMR spectrum. However, the remaining data and close similarity to the spectrum of **4** strongly sup-  
13 9 ported the structure as shown.

14 0 Compounds **1-5** all feature the unusual AEBA repeating units in their structures, which to the best of our  
14 1 knowledge have not been described in nature previously except in a series of molleureas isolated from the  
14 2 tunicate, *D. mole* (Issac, et al., 2017; Lu, et al., 2012). Molleamines are structurally identical to a subset of  
14 3 the molleureas, except that they lack the ureido linkage.

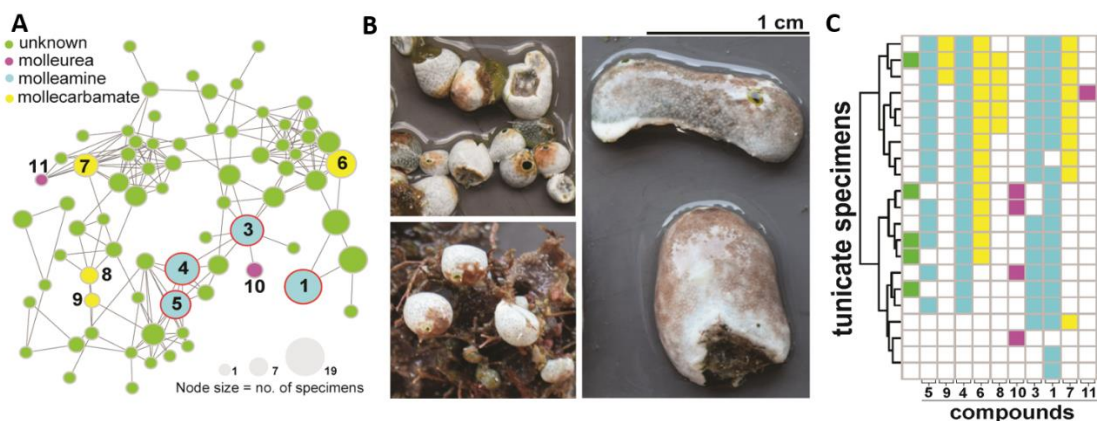

14 4  
14 5 **Figure 2.** AEBA-containing metabolites are widely distributed in *D. molle* tunicates and their predatory slug, *P.*  
14 6 *forskalii*. **A)** A molecular network of AEBA-containing metabolites from *D. molle* from the Solomon Islands. Nodes  
14 7 are colored according to type of compound identified. Compounds **1-5** (blue circles) are also found in *P. forskalii*. The  
14 8 size of the nodes is proportional to the number of tunicate specimens in which the compound was identified. **B)** Rep-  
14 9 resentative morphotypes of *D. molle* tunicates from the Solomon Islands, from which the compounds shown in panel  
15 0 A were identified. **C)** Distribution of AEBA-containing compounds shown in the network in panel A. The coloring  
15 1 scheme is identical to that used in panel A. Molleamine compounds (blue) were first identified in the *P. forskalii*  
15 2 specimen described here, and they are widespread in the slug's tunicate prey. Other mollureas (pink) and mollecarb-  
15 3 mates (yellow) are also found in many of the animals.

15 4 **Figure supplement 1.** Chemical structure and MS/MS fragmentation of compounds structurally-related to  
15 5 molleamines identified by metabolomics analysis of *D. molle* specimens.

15 6 **Figure supplement 2.** Chemical structure and MS/MS fragmentation of compounds structurally-related to  
15 7 molleamines identified by metabolomics analysis of *D. molle* specimens.

15 8

15 9 In the same field trip in 2018 in which we obtained the *P. forskalii* sample, we also collected *D. molle*  
16 0 specimens spanning the known color morphs (*Hirose, et al., 2010; Hirose, et al., 2009*), and hundreds of  
16 1 specimens of other tunicates. *D. molle* color morphs are genetically very distinct, and thus *D. molle* is likely  
16 2 comprised of many different cryptic species. A metabolomics analysis of the sample set revealed that of 20  
16 3 *D. molle* specimens sampled, all contained diverse compounds in the AEBA-containing natural product  
16 4 family, including compounds **1** and **3-5** isolated from *P. forskalii* in this study (**Figure 2**). These results  
16 5 suggest that *P. forskalii* consumes *D. molle*, from which it obtains and concentrates the bioactive molleam-  
16 6 ines. The molleamine potency in assays (see below) is several orders of magnitude higher than the previ-  
16 7 ously reported activity for molleureas and mollecarbamates (*Issac, et al., 2017*), although the assays previ-  
16 8 ously performed on the latter compounds are quite different than what we have done here.

#### 16 9 **Molleamines selectively target specific cell types in the somatosensory nervous system**

17 0 Using mouse DRG neurons and glia, we performed a calcium imaging-based high-content phenotypic  
17 1 screening assay (*Teichert, et al., 2014; Teichert, et al., 2015; Teichert, et al., 2012*). Primary cultures from  
17 2 mouse DRG neurons were plated to obtain ~2,000 cells/well, and the intracellular calcium levels were  
17 3 simultaneously monitored in all the cells using Fura-2-AM dye. Calcium traces were extracted for individ-  
17 4 ual cells at the end of the experiment. Initial screening used periodic depolarizations of the DRG neurons  
17 5 with the application of extracellular ATP (20  $\mu$ M), KCl (30 mM), or acetylcholine (ACh, 1 mM), which  
17 6 were expected to function primarily by activating purinergic receptors, voltage-gated  $Ca^{2+}$  channels, and  
17 7 acetylcholine receptors, respectively. At the end of each experiment, a series of pharmacological differen-  
17 8 tiators ( $\kappa$ M-conopeptide RIIIJ ( $\kappa$ M-RIIIJ), allylisothiocyanate (AITC), menthol, and capsaicin) aided in the  
17 9 identification of specific cell types. Thus, by interrogating cells with different pharmacological agents, the  
18 0 effects of extracts and pure compounds could be readily identified. In addition, cell size determination,  
18 1 fluorescent labeling with IB4, and the use of transgenic fluorescent markers to label calcitonin gene-related  
18 2 peptide (CGRP) expressing PNs, served to further differentiate cell types into at least 16 reproducible and  
18 3 distinct cell classes (*Giacobassi, et al., 2020*).



18 4 Bioactivity screening of purified **1-5** at 20  $\mu\text{M}$  revealed molleamine C (**3**) as a cell-type selective ligand  
 18 5 (**Figure 3, Figure 3-table supplement 1-2**). Compound **3** potently and completely blocked the response of  
 18 6 PN cells to ACh and modestly blocked the response of A $\delta$ -LTMRs to ATP, but it had virtually no observ-  
 18 7 able impact on DRG cells in response to KCl. This was a unique and promising phenotype in comparison  
 18 8 to other compounds we have screened. Moreover, because PNs are therapeutic targets in pain, while A $\delta$ -  
 18 9 LTMRs are potential pain targets implicated in mechanical allodynia under neuropathic conditions  
 19 0 (*Dhandapani, et al., 2018*), we chose to focus on **3**.

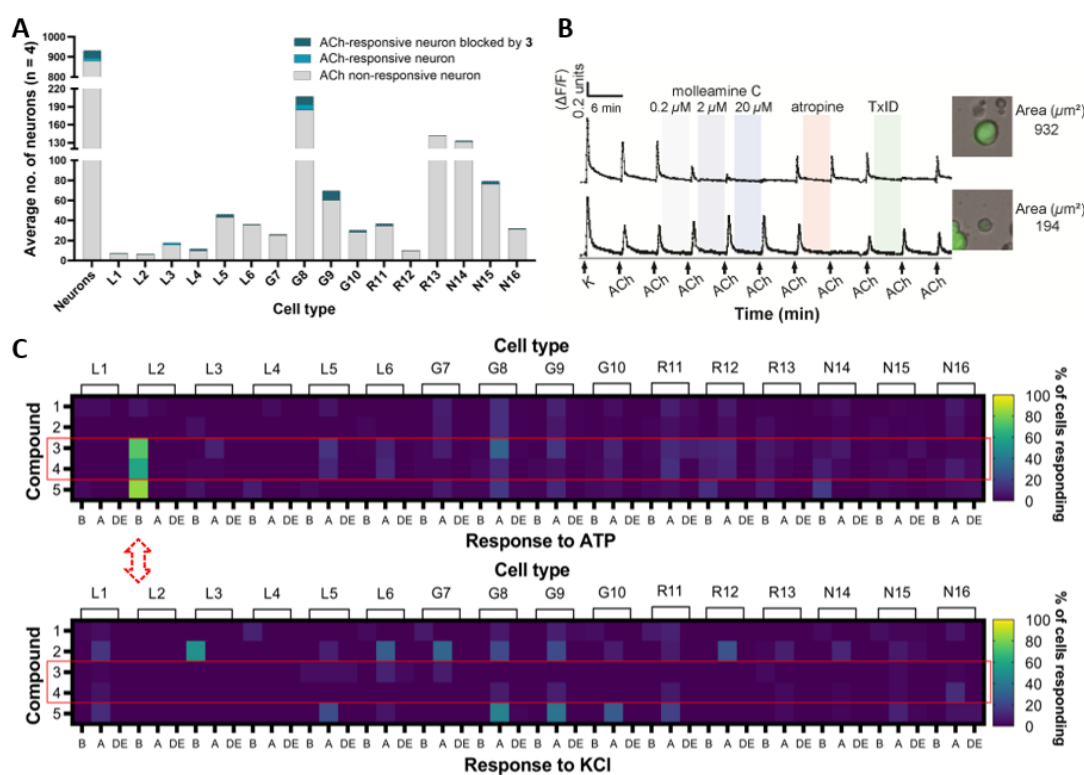

19 1  
 19 2 **Figure 3.** Constellation pharmacology of compounds **1-5** in DRG neurons. Descriptors L1-6, G7-10, R11-13, and  
 19 3 N14-16 refer to neuronal cell types found in the DRG, (*Bosse, et al., 2021; Giacobassi, et al., 2020*) but importantly  
 19 4 for this figure, G8 and G9 cells comprise pain sensors (PNs), while L2 cells are light touch-responsive A $\delta$ -LTMRs.  
 19 5 **A**) and **B**) Molleamine C (**3**) is a nAChR antagonist. Compound **3** (0.2-20  $\mu\text{M}$ ) was applied in experiments (n = 4)  
 19 6 using ACh (1 mM), with an average of ~900 neurons observed per experiment. **A**) Average number of neurons with  
 19 7 ACh response blocked by **3** (20  $\mu\text{M}$ ). The y-axis shows the average number of neurons, while the x-axis indicates  
 19 8 neuronal cell type. **B**) Representative individual DRG neurons responding to ACh (1 mM). The y-axis indicates intra-  
 19 9 cellular  $[\text{Ca}^{2+}]$ , reflected in the normalized min/max fluorescence ratio of 340 nM/380 nM from the Fura-2-AM  $\text{Ca}^{2+}$   
 20 0 indicator. The x-axis is time (min), where ACh (1 mM) is repeatedly pulsed (arrows), with incubation of increasing

20 1 concentrations of compound **3**, muscarinic receptor agonist atropine, and peptide nAChR antagonist TxID. Inset fig-  
20 2 ures show the bright-field image of the corresponding cell (cross-sectional area in  $\mu\text{m}^2$ ). **C**) Compounds **3-4** selectively  
20 3 block ATP activation in A $\delta$ -LTMRs, while response to KCl is unaffected. Compounds (applied at 20  $\mu\text{M}$ ) are in the  
20 4 y-axis, while the x-axis is activity observed in each cell type: amplification (A) of the response to ATP or KCl; blocking  
20 5 (B) of the response to ATP or KCl; and direct effects (DE), in which compounds directly depolarize cells.

20 6 **Figure supplement 1.** Constellation pharmacology indicates that compounds **3-5** are selective against L2 DRG  
20 7 neurons, which are A $\delta$ -low threshold mechanoreceptors (LTMRs).

20 8 **Figure supplement 2.** Constellation pharmacology of molleamine C and transcriptomics analysis of neurons with  
20 9 responses to acetylcholine (ACh) blocked by molleamine C (20  $\mu\text{M}$ ) and TxID (1  $\mu\text{M}$ ).

210 **Figure supplement 3.** Molleamine C does not affect  $\alpha 7$ -nAChRs.

211 **Table supplement 1.** Census of effects elicited by compounds **1-5** on ATP-induced depolarization in 16 DRG  
212 neuronal subtypes screened in calcium imaging experiments.

213 **Table supplement 2.** Census of effects elicited by compounds **1-5** on K<sup>+</sup>-induced depolarization in 16 DRG  
214 neuronal subtypes screened in calcium imaging experiments.

215

### 216 **Molleamine C (3) is an antagonist of nAChRs in peptidergic nociceptors**

217 When we treated DRG neurons with ACh (1 mM), only a relatively small subset of cells responded (~5%  
218 of neurons, **Figure 3A**). The strongest responses were observed in PNs, although only <10% of PNs re-  
219 sponded. When molleamine C (**3**) was applied at 20  $\mu\text{M}$ , the responses to ACh in many cells were almost  
220 completely blocked (**Figure 3B**). Block was dose dependent and could be observed at concentrations as  
221 low as 0.2  $\mu\text{M}$  (**Figure 3B**). To differentiate nAChR (ion channel) versus muscarinic (GPCR) activity,  
222 either atropine (muscarinic antagonist)(Zwart and Vijverberg, 1997) or the  $\alpha$ -conotoxin TxID (nicotinic  
223 antagonist)(Luo, et al., 2013) was applied in a calcium imaging experiment. In all cases, ACh responses  
224 that were blocked by TxID were also blocked by **3**. On the contrary, ACh responses that were blocked by  
225 atropine (in glia and some neurons) were not blocked by **3**. Taken together, these results indicate that **3** is  
226 an nAChR antagonist.

227 Agonists and positive allosteric modulators of nAChR subtypes  $\alpha 4\beta 2$ ,  $\alpha 6\beta 4$ , and  $\alpha 7$  are analgesic in  
228 various animal models, as are antagonists of  $\alpha 9\alpha 10$  (Christensen, et al., 2017; Cucchiaro, et al., 2008;  
229 Hone, et al., 2018; Limapichat, et al., 2014; Loram, et al., 2012; Romero, et al., 2017; Zheng, et al., 2020).

23 0 To identify the specific nAChR subtype composition modulated by **3**, we performed calcium imaging ex-  
23 1 periments, and individual cells whose responses to ACh were blocked by **3** were picked for single-cell  
23 2 transcriptomic analysis. We found that nAChR genes encoding subunits  $\alpha 3$  (Chrna3),  $\alpha 6$  (Chrna6),  $\beta 3$   
23 3 (Chrn3),  $\beta 4$  (Chrn4), and  $\beta 2$  (Chrn2) are significantly expressed in neurons that respond to **3** (**Figure**  
23 4 **3-figure supplement 2**). At 1  $\mu\text{M}$ , TxID should completely block both the  $\alpha 3\beta 4$  and the  $\alpha 6\beta 4$  nAChR  
23 5 subtypes, supporting the activity of **3** as an antagonist of one or both receptors.

23 6 Previous studies have shown that DRGs functionally express the  $\alpha 7$  nAChR (Hone, et al., 2012; Smith,  
23 7 et al., 2013) To observe the calcium transients elicited by the opening of  $\alpha 7$  receptors, we applied the  
23 8 positive allosteric modulator PNU 120596 before depolarization with ACh. Molleamine C (**3**) was inactive  
23 9 against the elicited  $\alpha 7$  nAChR activity (**Figure 3-figure supplement 3**).

24 0 To assess the functional effects of **3** on both  $\alpha 3\beta 4$  and  $\alpha 6\beta 4$  nicotinic acetylcholine receptors (nAChR),  
24 1 the compound was applied to *Xenopus laevis* oocytes expressing  $\alpha 3$ - and  $\alpha 6$ -containing nAChRs, measuring  
24 2 the responses to acetylcholine (ACh) at 100  $\mu\text{M}$ . The compound exhibited partial antagonism of ACh-  
24 3 evoked currents mediated by mouse  $\alpha 3\beta 4$  nAChR and rat  $\alpha 6/\alpha 3\beta 4$  nAChR, with  $\text{IC}_{50}$  values (and 95%  
24 4 confidence intervals) of 1.43 (0.4 – 5.1)  $\mu\text{M}$  and 3.10 (1.9 – 5.0)  $\mu\text{M}$ , respectively (**Figure 4**). The partial  
24 5 block of  $\alpha 3\beta 4$  and  $\alpha 6/\alpha 3\beta 4$  plateaued at approximately 76% and 82%, respectively. Although **3** is a partial  
24 6 antagonist of the receptors, it exhibits complete block of calcium flux in PNs because the cells are unable  
24 7 to achieve the ion concentration necessary to induce depolarization in the assay conditions.

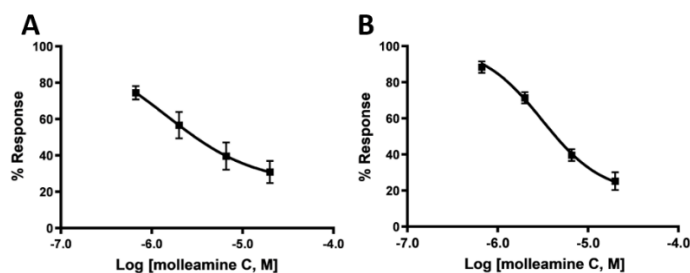

24 8  
24 9 **Figure 4.** Compound **3** is a partial antagonist of nAChRs expressed in *X. laevis* oocytes, as determined by electro-  
25 0 physiology. The  $x$ -axis is  $\log [3]$ , while the  $y$ -axis is the response to ACh at varying  $[3]$ , in comparison to ACh without  
25 1 **3**, given as the mean  $\pm$  SEM from at least four separate oocytes. Ranges in parentheses are 95% confidence intervals.

25 2 **A)** Mouse  $\alpha 3\beta 4$  nAChR,  $IC_{50}$  1.43 (0.4 – 5.1)  $\mu$ M, Hill slope 0.89 (0.20 -2.0). **B)** Rat  $\alpha 6/\alpha 3\beta 4$  nAChR,  $IC_{50}$  1.4 (1.9 –  
25 3 5.0)  $\mu$ M, Hill slope 1.3 (0.67 - 1.90).

25 4

### 25 5 **Molleamine C (3) blocks ACh signaling in the sympathetic nervous system**

25 6 Because  $\alpha 3$ - and  $\alpha 6$ -containing neurons are found in several important cell types in the peripheral nervous  
25 7 system, we aimed to determine the impact of **3** in those neurons. We performed constellation pharmacology  
25 8 assay using primary cultures of superior cervical ganglion (SCG) cells, which are involved in the fight-or-  
25 9 flight response. SCGs contain abundant  $\alpha 3\beta 4$ -containing nAChRs, with a lower number of other nAChR  
26 0 types (Simeone, et al., 2019). Consistent with this observation, in our hands almost all SCGs responded to  
26 1 ACh (300  $\mu$ M) by depolarization and influx of calcium (**Figure 5**). When treated with **3** (20  $\mu$ M), the influx  
26 2 of calcium was blocked in essentially all SCG neurons. This block was only complete in a subset of neurons,  
26 3 and partial block was observed in 95 % of ACh-responsive neurons, consistent with a mixture of nAChR  
26 4 subtypes, not all of which respond to **3**, in this cell population. This data reinforce the primary role of **3** as  
26 5 a partial antagonist of  $\alpha 3\beta 4$  and  $\alpha 6/\alpha 3\beta 4$  nAChRs. This also represents the first application of constellation  
26 6 pharmacology to the sympathetic nervous system, showing the broad utility of the method in differentiating  
26 7 cells and investigating mechanism of action of neuroactive drugs.

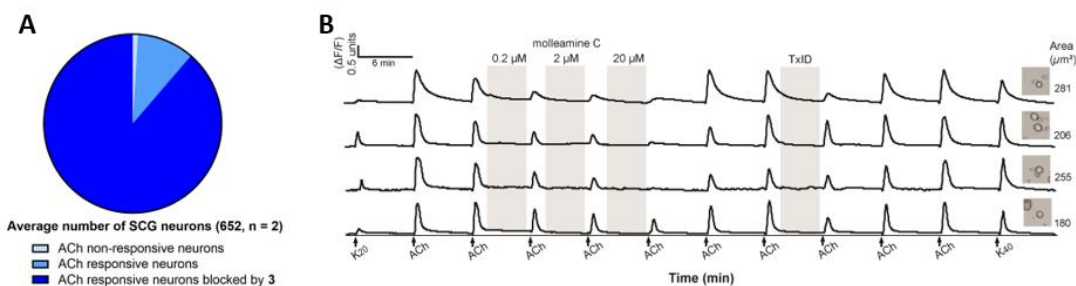

26 8

26 9 **Figure 5.** Constellation pharmacology indicates that **3** blocks ACh signaling in primary cultures of SCG neurons.  
27 0 SCG cells were treated with ACh (300  $\mu$ M), **3** (0.2, 2 and 20  $\mu$ M, and TxID (1  $\mu$ M). **A)** Average number of neurons  
27 1 with ACh response blocked by **3** (20  $\mu$ M) (n = 2). **B)** Representative individual SCG neurons responding to ACh. The  
27 2 y-axis indicates intracellular  $[Ca^{2+}]$ , reflected in the normalized min/max fluorescence ratio of 340 nM/380 nM from

27 3 the Fura-2-AM Ca<sup>2+</sup> indicator. The *x*-axis is time (min), where ACh (1 mM) is repeatedly pulsed (arrows), with incu-  
27 4 bation of **3** and TxID. Inset figures show the bright-field image of the corresponding cell (cross-sectional area in μm<sup>2</sup>).  
27 5

### 27 6 **Molleamine C (3) indirectly blocks P2Y1 signaling in Aδ-LTMRs**

27 7 At concentrations between 6.7 μM and 180 μM, **3** modestly but selectively blocked ATP signaling in Aδ-  
27 8 LTMRs (**Figure 6A**). Single-cell transcriptomics revealed the purinergic receptor P2Y1 as the major po-  
27 9 tential target in Aδ-LTMRs (Zheng, *et al.*, 2019). A selective P2Y1 agonist, MRS 2365 (Lu, *et al.*, 2007),  
28 0 was applied to DRG neurons, leading to selective, robust depolarization of Aδ-LTMRs (**Figure 6-table**  
28 1 **supplement 1**). Molleamine C (**3**) at 20 and 180 μM selectively blocked the effect of MRS 2365 (**Figure**  
28 2 **6B**), indicating selective activity against P2Y1-mediated signaling in mouse Aδ-LTMR neurons. However,  
28 3 **3** did not inhibit human P2Y1 in HEK293 cells, and P2Y1 is distributed in several cells in the DRG that  
28 4 were not blocked by **3**, indicating that P2Y1 itself is not blocked in Aδ-LTMRs, and instead the inhibition  
28 5 is due to an indirect effect provoked by **3**.

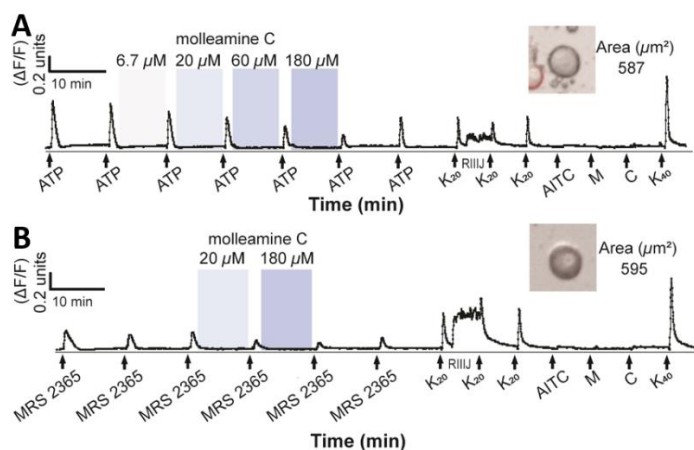

28 6  
28 7 **Figure 6.** Compound **3** inhibits P2Y1-mediated responses in Aδ-LTMR DRG neurons. The *y*-axis indicates intracel-  
28 8 lular [Ca<sup>2+</sup>], reflected in the normalized min/max fluorescence ratio of 340 nM/380 nM from the Fura-2-AM Ca<sup>2+</sup>  
28 9 indicator. The *x*-axis is time (min), where **A**) ATP (20 μM) or **B**) MRS 2365 (100 nM) activation is opposed by  
29 0 addition of (from 6.7 to 180 μM). Ligands used to differentiate cell types (K<sub>20</sub>, potassium chloride (20 mM); RIIII (1  
29 1 μM); AITC (100 μM); M, menthol (400 μM); C, capsaicin (500 nM); K<sub>40</sub>, potassium chloride (40 mM)) are added at

29 2 the end of the experiment. Inset figures show the bright-field image of the corresponding cell (cross-sectional area in  
29 3  $\mu\text{m}^2$ ).

29 4 **Figure supplement 1.** Compound **3** inhibits responses from L2 neurons after depolarization with a P2Y1 agonist  
29 5 MRS 2365 (100 nM).

29 6 **Figure supplement 2.** Compound **3** does not inhibit P2Y1 activity in human embryonic kidney (HEK-293)  
29 7 overexpressing GCaMP6s.

29 8 **Table supplement 1.** Census of effects elicited by **3** on MRS2365-induced depolarization in 16 DRG neuronal  
29 9 subtypes screened in two calcium imaging experiments.

3 0 0

### 3 0 1 **Preliminary *in vivo* evaluation of molleamine C (3)**

3 0 2 Because of the effects of **3** dampening signals in pain relevant neurons PNs and A $\delta$ -LTMRs, we assessed  
3 0 3 the impact of **3** on both acute and persistent pain perception in mice using a formalin assay (*Fu, et al.,*  
3 0 4 *2001*). Compared with the vehicle, 5 mg/kg and 20 mg/kg doses of **3** decreased the pain response in Phase  
3 0 5 I ( $p < 0.05$ ). The highest dose of **3** at 30 mg/kg modestly attenuated the pain responses in both Phase I and  
3 0 6 II at  $p = 0.06$  (**Figure 7**). The biphasic response in the formalin test is believed to reflect the direct activation  
3 0 7 of primary afferent sensory neurons (Phase I) and sensitization of the central nervous system in combination  
3 0 8 with inflammatory factors (Phase II) (*Hunnskaar and Hole, 1987; McNamara, et al., 2007; Tjølsen, et al.,*  
3 0 9 *1992*). Therefore, the effects of **3**, if supported by further studies, might be caused by both peripheral and  
3 10 central mechanisms. These results should be viewed as preliminary, as much more work is required to  
3 11 determine whether **3** has analgesic potential in therapy and to connect our observed molecular mechanisms  
3 12 to any *in vivo* activity.

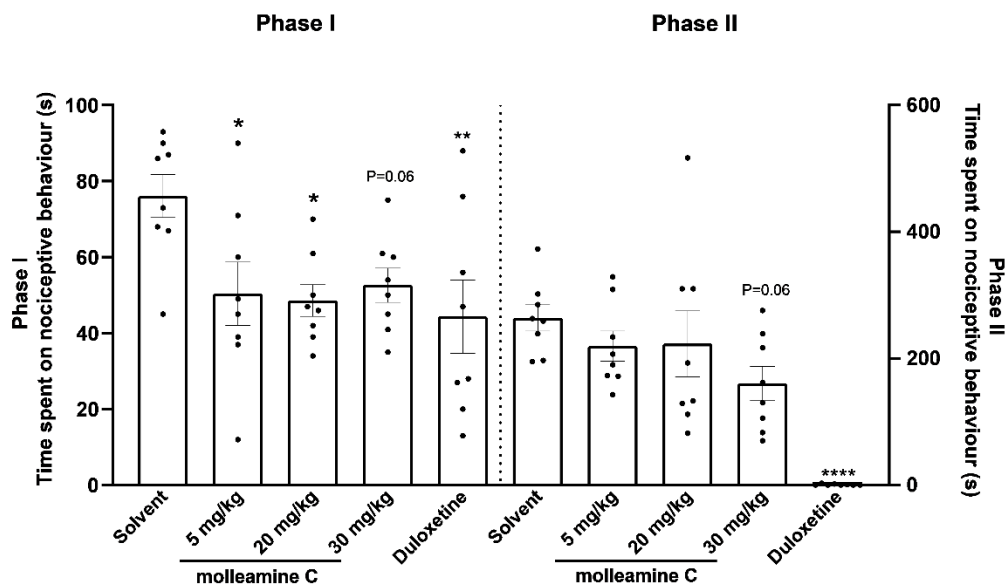

3 13  
3 14 **Figure 7.** Compound **3** is antinociceptive in the formalin test. Male adult mice (n = 8 per group) were pretreated with  
3 15 **3** (5 mg/kg, 20 mg/kg, 30 mg/kg, i.p.), vehicle (5 mL/kg, i.p.) or duloxetine (10 mg/kg, 10 mL/kg, i.p.). Formalin (5%  
3 16 in saline) was injected into the left hind paw pad after dosing; nociceptive behaviors were recorded for 0-35 min.  
3 17 Phase I represents the sum of time spent on nociceptive behavior in the first 5 min immediately after formalin injection  
3 18 while Phase II denotes the response period 20-35 min after injection. Each animal is represented by a circle, and the  
3 19 average SEM is shown with error bars. Significance in comparison to vehicle: \* $p < 0.05$ , \*\* $p < 0.01$ , \*\*\*\* $p < 0.0001$ .  
3 20 Compound **3** inhibited nociceptive behaviors in Phase I at doses 5 mg/kg ( $p < 0.05$ ), 20 mg/kg ( $p < 0.05$ ), and 30 mg/kg  
3 21 ( $p = 0.06$ ) and in Phase II at 30 mg/kg ( $p = 0.06$ ).

3 22 **Figure supplement 1.** Stability of compound **3** in mouse plasma over 24 h.

3 23 **Figure supplement 2.** Cytotoxicity evaluation of compound **3** in *in vitro* MTT assay with human embryonic kidney  
3 24 (HEK-293) cells.

3 25 **Figure supplement 3.** Zebrafish photomotor-response after exposure to increasing concentrations of compound **3**.

3 26  
3 27 Stability of **3** was monitored in mouse blood plasma over 24 hours. No degradation was detected within  
3 28 an hour, but after 16 hours significant degradation of **3** (>50%) was observed (**Figure 7-figure supplement**  
3 29 **1**). These data suggest that the majority of **3** remained intact over the course of the formalin experiment.  
3 30 No acute toxicity was observed at the chosen highest dose. However, mortality was observed in mice at

3 3 1 doses above 45 mg/kg. The compound was found to have a cytotoxic effect in human embryonic kidney  
3 3 2 (HEK-293) cells with  $IC_{50} = 54 \mu\text{M}$  (**Figure 7-figure supplement 2**). Moreover, **3** did not cause toxicity  
3 3 3 to juvenile zebrafish at doses up to  $100 \mu\text{M}$ , although a hyperactive phenotype was observed at doses as  
3 3 4 low as  $30 \mu\text{M}$  (**Figure 7-figure supplement 3**).

3 3 5

## 3 3 6 **DISCUSSION**

3 3 7 Our previous work with DRG neurons led to the identification of several families of active marine natural  
3 3 8 products that we have investigated for antinociceptive efficacy (*Lin, et al., 2010; Lin, et al., 2011; Lin, et*  
3 3 9 *al., 2017*). In the course of this work, we identified several hits that seemed to target only a small subset of  
3 4 0 cells, but we had no framework to identify those cells, leading us to develop constellation pharmacology.  
3 4 1 Here, we show the power of constellation pharmacology to rapidly identify cell-type selective agents with  
3 4 2 therapeutic promise. Although A $\delta$ -LTMRs constituted <2% of DRG neurons, we could immediately assess  
3 4 3 the selective impact of **3-5** in blocking ATP-triggered, P2Y1-based depolarization of that neuronal subclass.  
3 4 4 Although ACh-responsive cells were <4% of the DRG neurons, selective block of ACh in peptidergic no-  
3 4 5 ciceptors was immediately apparent. Because both neuronal subclasses are important in pain conditions,  
3 4 6 we are currently assessing the potential of **3** as a neuroactive agent in analgesia and anesthesia.

3 4 7 The effects of **3** as an  $\alpha 3\beta 4$  and  $\alpha 6/\alpha 3\beta 4$  nAChR partial antagonist were clearly elucidated using a com-  
3 4 8 bination of electrophysiology and constellation pharmacology. Where those receptors were dominant in  
3 4 9 neurons, almost complete block of calcium flux could be observed, but when those receptors were absent  
3 5 0 or other receptors were dominant partial or no block was seen. Although there are countless nAChR-acting  
3 5 1 drugs and ligands, there are few close analogs of **3** in the literature in terms of biological activity. For  
3 5 2 example, nAChR agonist AT-1001 has been extensively studied (*Toll, et al., 2012; Yuan, et al., 2017*).  
3 5 3 Although it was initially described as a selective  $\alpha 3\beta 4$  partial antagonist (*Toll, et al., 2012*), more recent  
3 5 4 data reveal that it is a weak partial agonist that is competitive with ACh, while our data definitively rule out  
3 5 5 that possibility for **3**. Its physiological actions on animals are quite different than what we have observed



3 5 6 for **3**. There is also a growing list of marine natural products targeting nAChRs, including compounds from  
3 5 7 algae, tunicates, sponges, mollusks, dinoflagellates, bryozoans, and corals (*Aráoz, et al., 2015; Culver, et*  
3 5 8 *al., 1984; Hamouda, et al., 2015; Kasheverov, et al., 2015; Kudryavtsev, et al., 2014; Tsuneki, et al., 2005;*  
3 5 9 *Wonnacott and Gallagher, 2006*). However, none of these agents exhibit the selectivity shown by **3**. Most  
3 6 0 of them target neuromuscular nAChRs primarily and thus cause acute toxicity in vertebrates, whereas **3**  
3 6 1 only showed lethality in mice at doses greatly elevated above the  $\alpha 3\beta 4$  and  $\alpha 6/\alpha 3\beta 4$  nAChR partial antag-  
3 6 2 onist activities, and no evidence of lethality in fish despite provoking a strong hyperactive response even at  
3 6 3 low doses. These results demonstrate that **3** has a different set of biological actions than previously charac-  
3 6 4 terized nAChR-targeted small molecules from the ocean.

3 6 5 In this study, we show that previously unknown compounds molleamines are widely distributed in *D.*  
3 6 6 *molle* tunicates, and that the most potent compounds are likely concentrated in the diet of *P. forskalii*, where  
3 6 7 they may serve as defensive metabolites. Our ability to focus on neuronal cell-type selectivity led to iden-  
3 6 8 tification of molleamines as novel neuroactive compounds. The chemical simplicity of these polymeric  
3 6 9 compounds, as well as our development of a robust synthesis, makes them accessible for future structure-  
3 7 0 activity relationship studies to assess the pharmaceutical potential of this new chemical class of neuroactive  
3 7 1 compounds more fully.

3 7 2

## 3 7 3 **METHODS**

### 3 7 4 **General experimental procedures**

3 7 5 The UV data were acquired using a Thermo Scientific Evolution 201 UV-VIS Spectrophotometer. IR spec-  
3 7 6 tra were recorded using a Nicolet iS50 FT-IR spectrometer. NMR data were collected using either a Varian  
3 7 7 INOVA 500 spectrometer operating at 500 MHz for  $^1\text{H}$  and 125 MHz for  $^{13}\text{C}$ , and equipped with a 3mm  
3 7 8 Nalorac MDBG probe with a  $z$ -axis gradient; or a Varian INOVA 600 spectrometer operating at 600 MHz  
3 7 9 for  $^1\text{H}$  and 150 MHz for  $^{13}\text{C}$  NMR, and equipped with a 5 mm  $^1\text{H}[^{13}\text{C},^{15}\text{N}]$  triple resonance cold probe with  
3 8 0 a  $z$ -axis gradient. NMR shift values were referenced to the residual solvent signals (DMSO- $d_6$ :  $\delta_{\text{H}}$  2.50,  $\delta_{\text{C}}$

3 8 1 39.5). UPLC-qTOFMS-MS/MS analysis of the compounds were performed on a Waters Acquity UPLC  
3 8 2 system coupled to a Waters Xevo G2-XS qTOF equipped with an ESI source. HPLC separations were  
3 8 3 performed using a Thermo Scientific Dionex WPS-3000 HPLC system equipped with a Photodiode array  
3 8 4 detector. Unless stated otherwise, all reagents and solvents were purchased from commercial suppliers and  
3 8 5 were used without further purification.

#### 3 8 6 **Biological material and gene sequencing**

3 8 7 *P. forskalii* was collected by hand using SCUBA in April 2018 (specimen SI-223L) in Solomon Islands (S  
3 8 8 09° 22.891' E 159° 52.428'). The freshly collected sample was kept frozen at -20 °C until use. The DNA  
3 8 9 was extracted from a small portion of the sample (~25 mg) using the Qiagen DNeasy kit (Qiagen, German-  
3 9 0 town, MD). The mitochondrial COXI genes were amplified using Folmer's universal COXI primers  
3 9 1 LCO1490 (5'-GGT CAA CAA ATC ATA AAG ATA TTG G) and HCO2198 (5'-TAA ACT TCA GGG  
3 9 2 TGA CCA AAA AAT CA) (Folmer, et al., 1994). The polymerase chain reaction was performed using a  
3 9 3 master mix consisting of 38 µL H<sub>2</sub>O, 5 µL 10× PCR buffer (High Fidelity Buffer; Invitrogen, Waltham,  
3 9 4 MA), 1.5 µL 50 mM MgCl<sub>2</sub>, 1 µL 10 mM LCO1490 primer, 1 µL 10 mM HCO2198 primer, 1 µL 10 mM  
3 9 5 dNTP mix, 0.5 µL 5U/µL Platinum Taq DNA Polymerase High Fidelity (Invitrogen) and 2 µL 0.25 ng/µL  
3 9 6 template DNA. PCR conditions were as follows: hot start (94 °C/2 min), 39 cycles of [94 °C/30 s, 45 °C/30  
3 9 7 s, 72 °C/2 min], and extension (72 °C/10 min). The PCR product was gel purified using the Qiagen QI-  
3 9 8 Aquick kit and Sanger sequenced (Genewiz, Boston, MA). The COX1 gene sequence was submitted to  
3 9 9 GenBank (accession number MW663488).

#### 4 0 0 **Extraction and isolation**

4 0 1 The frozen sample (50 g wet weight) was thawed, diced, and exhaustively extracted with ethanol. The  
4 0 2 extract was dried *in vacuo* and partitioned between H<sub>2</sub>O (100 mL) and CHCl<sub>3</sub> (100 mL × 3). The CHCl<sub>3</sub>-  
4 0 3 soluble extract was purified using reversed-phase HPLC with a Phenomenex Luna C<sub>18</sub> column (250 × 10  
4 0 4 mm) and a linear gradient from 20% to 100% CH<sub>3</sub>CN in H<sub>2</sub>O (0.1% TFA) over 20 min at 3mL/min flow  
4 0 5 rate. Resulting fractions were further purified using reversed-phase HPLC with a Phenomenex Luna C<sub>18</sub>

4 0 6 column (250 × 4 mm) with a linear gradient from 20% to 50% CH<sub>3</sub>CN in H<sub>2</sub>O (0.1% TFA) over 40 min at  
4 0 7 1 mL/min flow rate to give compounds **1** (1.5 mg), **3** (4.0 mg), **4** (1.8 mg) and **5** (0.7 mg). One further  
4 0 8 fraction was purified using the same C<sub>18</sub> column with a linear gradient from 5% to 100% CH<sub>3</sub>CN in H<sub>2</sub>O  
4 0 9 (0.1% TFA) over 40 min at 1 mL/min to yield compound **2** (0.6 mg). Overall yield: 0.017% of wet weight.

4 10 *Molleamine A (1)*: colorless amorphous solid; UV (CH<sub>3</sub>OH) λ<sub>max</sub> (log ε) 207 (4.2) nm; IR ν<sub>max</sub> 3290, 3061,  
4 11 2919, 2849, 1678, 1532, 1445, 1207, 1138 cm<sup>-1</sup>; <sup>1</sup>H and <sup>13</sup>C NMR, Table 1; HRESIMS *m/z* 269.1656  
4 12 [M+H]<sup>+</sup> (calcd for C<sub>17</sub>H<sub>21</sub>N<sub>2</sub>O<sup>+</sup>, 269.1649).

4 13 *Molleamine B (2)*: colorless amorphous solid; UV (CH<sub>3</sub>OH) λ<sub>max</sub> (log ε) 206 (3.6) nm; IR ν<sub>max</sub> 3280, 3061,  
4 14 2919, 2848, 1678, 1537, 1445, 1207, 1140 cm<sup>-1</sup>; <sup>1</sup>H and <sup>13</sup>C NMR, Table 1; HRESIMS *m/z* 285.1603  
4 15 [M+H]<sup>+</sup> (calcd for C<sub>17</sub>H<sub>21</sub>N<sub>2</sub>O<sub>2</sub><sup>+</sup>, 285.1598).

4 16 *Molleamine C (3)*: colorless amorphous solid; UV (CH<sub>3</sub>CN) λ<sub>max</sub> (log ε) 205 (4.7) nm; IR ν<sub>max</sub> 3272, 3063,  
4 17 2910, 2846, 1682, 1538, 1446, 1206, 1139 cm<sup>-1</sup>; <sup>1</sup>H and <sup>13</sup>C NMR, Table 1; HRESIMS *m/z* 416.2345  
4 18 [M+H]<sup>+</sup> (calcd for C<sub>26</sub>H<sub>30</sub>N<sub>3</sub>O<sub>2</sub><sup>+</sup>, 416.2333).

4 19 *Molleamine D (4)*: colorless amorphous solid; UV (CH<sub>3</sub>CN) λ<sub>max</sub> (log ε) 206 (3.9) nm; IR ν<sub>max</sub> 3305, 2918,  
4 20 2849, 1682, 1539, 1447, 1211, 1143 cm<sup>-1</sup>; <sup>1</sup>H and <sup>13</sup>C NMR, Table 1; HRESIMS *m/z* 563.3022  
4 21 [M+H]<sup>+</sup> (calcd for C<sub>35</sub>H<sub>39</sub>N<sub>4</sub>O<sub>3</sub><sup>+</sup>, 563.3017).

4 22 *Molleamine E (5)*: colorless amorphous solid; UV (CH<sub>3</sub>CN) λ<sub>max</sub> 209 nm; IR ν<sub>max</sub> 3308, 2918, 2846,  
4 23 1682, 1580, 1446, 1210, 1143 cm<sup>-1</sup>; <sup>1</sup>H and <sup>13</sup>C NMR, Table 1; HRESIMS *m/z* 710.3719 [M+H]<sup>+</sup> (calcd  
4 24 for C<sub>44</sub>H<sub>48</sub>N<sub>5</sub>O<sub>4</sub><sup>+</sup>, 710.3701).

#### 4 25 **Synthesis of molleamine A (1)**

4 26 To an ice-cold solution of 2-(2-aminoethyl)benzoic acid (190 mg, 0.94 mmol) dissolved in 10% Na<sub>2</sub>CO<sub>3</sub>  
4 27 (10 mL) was added *N*-(9-fluorenylmethoxycarbonyloxy)succinimide (250 mg, 0.75 mmol) in acetone (10  
4 28 mL). The mixture was stirred overnight at rt. The solution was dried *in vacuo* to remove the acetone, and  
4 29 the remaining aqueous portion was acidified to pH=2 with addition of 6N HCl and stirred for 1 h. The  
4 3 0 precipitate obtained was repeatedly washed with deionized H<sub>2</sub>O and air dried. To the reaction product (240

4 3 1 mg) dissolved in dichloromethane (20 mL, cooled to 0 °C) was added in order HOBt (120 mg, 0.91 mmol),  
4 3 2 DIEA (120 mg, 0.91 mmol), phenethylamine (88 mg, 0.73 mmol), and a solution of EDC·HCl (180 mg,  
4 3 3 0.91 mmol) in dichloromethane (20 mL). The mixture was stirred overnight at rt. Water (20 mL) was then  
4 3 4 added, and then the dichloromethane layer was collected, dried with Na<sub>2</sub>SO<sub>4</sub>, and concentrated *in vacuo*.  
4 3 5 The resulting residue was stirred in 20% piperidine in DMF (5 mL) for 5 min, dried, and purified via re-  
4 3 6 versed-phase HPLC using Phenomenex Luna C<sub>18</sub> column (250 × 10 mm) with a linear gradient elution from  
4 3 7 20% to 25% CH<sub>3</sub>CN in H<sub>2</sub>O (0.1% TFA) over 20 min at 3.5 mL/min to yield **1** (117 mg, 46% yield): <sup>1</sup>H  
4 3 8 NMR (500 MHz, DMSO-*d*<sub>6</sub>) δ<sub>H</sub> 8.56 (1H, t, *J* = 5.4 Hz), 8.03 (3H, brs), 7.42 (1H, m), 7.30-7.33 (5H, m),  
4 3 9 7.26 (2H, d, *J* = 7.4 Hz), 7.22 (1H, t, *J* = 7.1 Hz), 3.49 (2H, td, *J* = 7.3, 5.4 Hz), 3.04 (2H, m), 2.93 (2H, m),  
4 4 0 2.86 (2H, t, *J* = 7.3 Hz); <sup>13</sup>C NMR (125 MHz, DMSO-*d*<sub>6</sub>) δ<sub>C</sub> 168.9, 139.4, 137.0, 135.3, 130.3, 129.9,  
4 4 1 128.7(×2), 128.4(×2), 127.4, 126.8, 126.2, 40.6, 40.2, 34.9, 31.0; HRESIMS *m/z* 269.1650 [M+H]<sup>+</sup> calcd  
4 4 2 for C<sub>17</sub>H<sub>21</sub>N<sub>2</sub>O<sup>+</sup>, 269.1649). Chromatographic co-elution of the natural with the synthetic compound  
4 4 3 showed a uniform peak (**Figure 1-figure supplement 25**).

#### 4 4 4 **Synthesis of molleamine C (3)**

4 4 5 To an ice-cold solution of 2-(2-aminoethyl)benzoic acid (150 mg, 0.74 mmol) dissolved in 10% Na<sub>2</sub>CO<sub>3</sub>  
4 4 6 (10 mL) was added *N*-(9-fluorenylmethoxycarbonyloxy)succinimide (209 mg, 0.62 mmol) in acetone (10  
4 4 7 mL). The mixture was stirred overnight at rt. The solution was dried *in vacuo* to remove the acetone, and  
4 4 8 the remaining aqueous portion was acidified to pH=2 with addition of 6N HCl and stirred for 1 h. The  
4 4 9 precipitate obtained was repeatedly washed with deionized H<sub>2</sub>O and air dried. To the reaction product (48  
4 5 0 mg) dissolved in dichloromethane (4 mL, cooled to 0 °C) was added in order HOBt (25 mg, 0.19 mmol),  
4 5 1 DIEA (24 mg, 0.19 mmol), molleamine A (40 mg, 0.15 mmol) in dichloromethane (1 mL), and a solution  
4 5 2 of EDC·HCl (36 mg, 0.19 mmol) in dichloromethane (5 mL). The mixture was stirred overnight at rt. Water  
4 5 3 (10 mL) was then added, and the dichloromethane layer was collected, dried with Na<sub>2</sub>SO<sub>4</sub>, and concentrated  
4 5 4 *in vacuo*. The resulting residue was stirred in 20% piperidine in DMF (1 mL) for 5 min, dried, and purified  
4 5 5 via reversed-phase HPLC using *Phenomenex* Luna C<sub>18</sub> column (250 × 10 mm) with an isocratic elution at

4 5 6 32% CH<sub>3</sub>CN in H<sub>2</sub>O (0.1% TFA) for 17 min at 3.5 mL/min to yield **3** (43 mg, 69% yield). The residue  
4 5 7 obtained was then subjected to reversed-phase HPLC to yield **3**: <sup>1</sup>H NMR (500 MHz, DMSO-*d*<sub>6</sub>) δ<sub>H</sub> 8.67  
4 5 8 (1H, t, *J* = 5.2 Hz), 8.48 (1H, t, *J* = 5.6 Hz), 8.01 (3H, brs), 7.41 (1H, m), 7.40 (1H, m), 7.35-7.26 (9H, m),  
4 5 9 7.21 (1H, t, *J* = 7.1 Hz), 3.49 (4H, m), 3.04 (2H, m), 2.93 (2H, t, *J* = 7.3 Hz), 2.92 (2H, t, *J* = 7.1 Hz), 2.86  
4 6 0 (2H, t, *J* = 7.3 Hz); <sup>13</sup>C NMR (125 MHz, DMSO-*d*<sub>6</sub>) δ<sub>C</sub> 169.4, 169.0, 139.5, 137.3(×2), 136.9, 135.6,  
4 6 1 130.5, 130.2, 130.0, 129.5, 128.8(×2), 128.4(×2), 127.5, 127.2, 126.8, 126.2(×2), 41.0, 40.6, 40.3, 35.0,  
4 6 2 32.1, 31.1; HRESIMS *m/z* 416.2332 [M+H]<sup>+</sup> calcd for C<sub>26</sub>H<sub>30</sub>N<sub>3</sub>O<sub>2</sub><sup>+</sup>, 416.2333). Chromatographic co-elution  
4 6 3 of the natural with the synthetic compound showed a uniform peak (**Figure 1-figure supplement 29**).

#### 4 6 4 **Metabolomics analysis**

4 6 5 UPLC-MS and MS/MS analyses of 21 tunicate and single mollusk specimens were done using an Agilent  
4 6 6 6530 Q-TOF mass spectrometer with a Kinetex C<sub>18</sub> column (2.6 μ, 100 Å, 100 x 4.6 mm, 1 mL/min) and a  
4 6 7 gradient from 5 to 100 % MeCN in 20 min. The raw LC-MS/MS data were converted to mgf format using  
4 6 8 MassHunter. The mgf version of the data was then submitted to molecular networking analysis using the  
4 6 9 GNPS web site (*Wang, et al., 2016*) with the standard parameter and MSCluster option turned off. The  
4 7 0 output result was visualized using Cytoscape v3.7 (*Shannon, et al., 2003*).

#### 4 7 1 **Animals**

4 7 2 All experiments involving the care and use of animals were conducted in accordance with ethical guidelines  
4 7 3 that were approved by the Institutional Animal Care and Use Committee (IACUC) of the University of  
4 7 4 Utah, Charles River Laboratories-Montreal IACUC, and the USA National Research Council and the Canadian  
4 7 5 Council on Animal Care (CCAC). In the formalin test male C57BL/6 mice (20-30 g, 6-8 weeks old,  
4 7 6 Charles River Laboratories, Canada) were acclimated for 5 days in the laboratory environment before the  
4 7 7 start of treatment.

#### 4 7 8 **Cell culture and calcium imaging of cultured DRG and SCG cells**

4 7 9 Descriptions of DRG and SCG cell preparation and calcium imaging protocols have been described in detail  
4 8 0 previously (*Hone, et al., 2020; Jackson and Tourtellotte, 2014; Light, et al., 2008; Memon, et al., 2017;*

4 8 1 *Memon, et al., 2019*). Briefly, lumbar DRG neurons were harvested from a CGRP-green fluorescent protein  
4 8 2 (GFP) mouse in a CD-1 genetic background. In these transgenic mice, PNs in the sensory neuronal popu-  
4 8 3 lation can be tracked through GFP expression. DRG neurons were dissociated by trypsinization and me-  
4 8 4 chanical trituration and were subsequently plated onto a 24-well poly-D-lysine-coated plate. DRG neurons  
4 8 5 were cultured and incubated overnight at 37 °C, in a 5% CO<sub>2</sub> tissue culture incubator and with 0.7 mL  
4 8 6 minimum essential medium (MEM, pH = 7.4) supplemented with 10% fetal bovine serum, penicillin (100  
4 8 7 U/mL), streptomycin (100 µg/mL), 10 mM HEPES, and 0.4% (w/v) glucose.

4 8 8 The cultured cells were incubated with Fura-2-acetoxymethyl ester (Fura-2-AM; Molecular Probes; 2.5  
4 8 9 µM) in MEM (0.7 mL) at 37 °C for 1 h and equilibrated at room temperature 0.5 hour prior to imaging.  
4 9 0 The MEM solution was then removed and the cells were washed three times (0.7 mL each) with observation  
4 9 1 solution (145 mM NaCl, 5mM KCl, 2mM CaCl<sub>2</sub>, 1 mM MgCl<sub>2</sub>, 1 mM sodium citrate, 10 mM HEPES, and  
4 9 2 10 mM glucose). Experiments were performed at rt using fluorescence microscopy. In each calcium imag-  
4 9 3 ing experiment, >1000 cells were imaged simultaneously with individual cells treated as individual samples  
4 9 4 and their individual responses analyzed. Changes in intracellular calcium level ([Ca<sup>2+</sup>]<sub>i</sub>) while applying  
4 9 5 different pharmacological agents were measured by taking the relative ratio of emissions at 510 nm result-  
4 9 6 ing from the excitation of the Fura-2-AM dye at 340 and 380 nm.

4 9 7 In general, calcium transients were elicited by a ~15-s application of a pharmacological agent/depolariz-  
4 9 8 ing stimulus as follows: the observation solution was aspirated from the well via a peristaltic pump con-  
4 9 9 trolled by a microfluidic system, and then a 700 µL solution of a depolarizing stimulus was added (either  
5 0 0 via pipet or the microfluidics system). After ~15-s incubation, the solution was replaced with observation  
5 0 1 solution in the same manner. The observation solution was typically replaced three more times over the  
5 0 2 next ~50 s. This washing procedure was repeated as needed at intervals ranging from 3 to 8 min.

5 0 3 Each DRG experiment was followed by sequential application of pharmacological agents to identify  
5 0 4 neuronal cell classes. Pharmacological identifiers present in each experiment included KCl (20 mM), κM-  
5 0 5 RIIII (1 µM), AITC (100 µM), menthol (400 µM), and capsaicin (300 nM). At the end of the experiment,

5 0 6 KCl (40 mM) was applied to assess viability of neurons. All solutions used in the experiment were prepared  
5 0 7 with DRG observation solution. Test compounds were dissolved in DMSO and diluted to the desired con-  
5 0 8 centrations with DRG observation solution (DMSO final concentration was kept at no more than 0.1 %  
5 0 9 (v/v)).

5 10 After each DRG calcium imaging experiment, the cells were incubated with 0.7 mL Hoechst stain (1000  
5 11  $\mu\text{g/mL}$ ) for 5 min and then washed 3x with the observation solution. After this, the cells were incubated  
5 12 with 0.7 mL Alexa-Fluor 647 Isolectin ( $2.5 \mu\text{g/mL}$ ) for 5 min and then washed 3 $\times$  with the observation  
5 13 solution. Finally, a bright-field image, a GFP image to visualize CGRP positive cells, and a Cy5 image to  
5 14 identify IB4-positive cells, were acquired using a rhodamine filter set. Nis elements and CellProfiler (*Jones,*  
5 15 *et al., 2008*) were used to acquire and create ROIs and to extract cellular information, respectively. Video  
5 16 information and trace data were extracted using in-house software built in Python and R language. Re-  
5 17 sponses to the pharmacological identifiers and characteristic IB4 and CGRP labeling were used to group  
5 18 cells into different subclasses (*Bosse, et al., 2021; Giacobassi, et al., 2020*).

5 19 Work with SCG cells was performed similarly, except that pharmacological differentiating agents were  
5 20 not used to classify the cell types. Our functional data shows that neurons in SCG are predominantly cho-  
5 21 linergic, which is consistent with previous literature reports.

## 5 22 **Functional classification of DRG neuronal subclasses**

5 23 Cell types are differentiated into 16 discrete types as follows. Cells with a cross-sectional area  $>500 \mu\text{m}^2$   
5 24 are classified as large (L), and cells with  $<500 \mu\text{m}^2$  cross-sectional area are divided into those that are  
5 25 CGRP-GFP positive (G), IB4 positive (R), or negative to both (N). L cells that are CGRP-GFP positive are  
5 26 further divided into those that do (L5) and do not (L6) respond to conotoxin RIIIIJ. L cells that are CGRP-  
5 27 GFP negative are divided in those that do not (L4) or do respond to conotoxin RIIIIJ; the latter are further  
5 28 divided into those without a direct effect to RIIIIJ (L3) and those that do have a direct effect (L1 and L2);  
5 29 the shape of the direct effect differentiates L1 (proprioceptors) and L2 ( $A\delta$ -LTMRs), as previously reported  
5 3 0 (*Giacobassi, et al., 2020*).

5 3 1 G cells are divided by their response to menthol: positive (G7), or negative; the negatives are further  
5 3 2 divided by whether they are capsaicin responsive (G8; peptidergic nociceptors), AITC responsive (G10),  
5 3 3 or respond to both (G9).

5 3 4 R cells are differentiated based upon their response to capsaicin (R11), AITC (R13, nonpeptidergic no-  
5 3 5 ciceptors), or both (R12). N cells are recognized based upon their response to capsaicin (N16), menthol  
5 3 6 (N15, thermosensors), or neither (N14, C-low threshold mechanoreceptors).

#### 5 3 7 **Dose-dependent effect of 3 on ATP-induced depolarization in DRG neurons**

5 3 8 The cells were depolarized by two ~15-s applications of ATP (20  $\mu$ M). After the second depolarization, the  
5 3 9 cells were incubated for 8 min with 6.7  $\mu$ M, 20  $\mu$ M, 60  $\mu$ M, and 180  $\mu$ M of **3** at times 13, 23, 33, and 43  
5 4 0 min, respectively. Each incubation with **3** was followed by application of ATP to determine the effect of **3**  
5 4 1 on the responses of the neurons to depolarization. A final application of ATP at 61 min was done to deter-  
5 4 2 mine the reversibility of the responses of the cells to depolarization in the presence of **3**. This experiment  
5 4 3 was repeated twice (36-day old male and female mice) with a total of about 3,600 DRG neurons.

#### 5 4 4 **Dose-dependent effect of 3 on MRS-2365-induced depolarization in DRG neurons**

5 4 5 The cells were depolarized by two ~15-s applications of MRS-2365 (100 nM). After the second depolari-  
5 4 6 zation, the cells were incubated for 8 min with 6.7  $\mu$ M, 20  $\mu$ M, 60  $\mu$ M, and 180  $\mu$ M of **3** at times 13, 23,  
5 4 7 33, and 43 min, respectively. Each incubation with **3** was followed by ~15s application of MRS-2365 to  
5 4 8 determine the effects of **3** on the responses of the neurons to depolarization. A final application of MRS-  
5 4 9 2365 at 61 min was done to determine the reversibility of the responses of the cells to depolarization in the  
5 5 0 presence of **3**. This experiment was repeated twice (36-day old male and female mice) with a total of about  
5 5 1 3,100 DRG neurons.

#### 5 5 2 **Constellation pharmacology of 3 on acetylcholine-induced depolarization in DRG neurons**

5 5 3 A ~15-s application of 30 mM KCl was done at the start of the calcium imaging experiment. This was  
5 5 4 followed by two consecutive ~15-s applications of acetylcholine (ACh, 1 mM). After the second application  
5 5 5 of ACh, the cells were incubated for 4 min with 0.2  $\mu$ M, 2  $\mu$ M, and 20  $\mu$ M of **3** at times 15, 21, and 27 min,



5 5 6 respectively and with 500 nM atropine and 1  $\mu$ M TxID at times 39 and 51 min, respectively. Each incuba-  
5 5 7 tion with the test compounds was preceded and followed by a ~15-s application of ACh. This experiment  
5 5 8 was done twice on a 34-day old male mouse (2 technical replicates; 1 biological replicate) with a total of  
5 5 9 2,400 DRG neurons and 5000 glia.

#### 5 6 0 **Constellation pharmacology of compounds 1-5 with ATP-induced depolarization**

5 6 1 The ~15-s application of 20  $\mu$ M ATP was used to induce depolarization in the cells. The cells were incu-  
5 6 2 bated for 8 min twice with 20  $\mu$ M of the test compound at times 13 and 33 min. Compounds **1-5** were tested  
5 6 3 in different wells and repeated in two calcium imaging experiments on 29 to 34-day old male and female  
5 6 4 mice with at least 1,000 DRG neurons per well.

#### 5 6 5 **Constellation pharmacology of compounds 1-5 with KCl-induced depolarization**

5 6 6 A ~15-s application 30 mM KCl was used to induce depolarization in the cells. The cells were incubated  
5 6 7 for 4 min twice with 10  $\mu$ M of the test compound at times 9 and 27 min. Compounds **1-5** were tested in  
5 6 8 different wells, and the experiment was done once for each compound on 42 to 44-day old male and female  
5 6 9 mice with at least 1,000 cells per well.

#### 5 7 0 **Constellation pharmacology of 3 targeting the $\alpha$ 7 nAChR**

5 7 1 The cells were depolarized by two ~15-s applications of ACh (1 mM). After the second application of ACh,  
5 7 2 the cells were pre-incubated for 4 min with 1  $\mu$ M PNU 120596 at times 9, 15, 33, 45, 51 min followed by  
5 7 3 a ~15-s co-application of ACh and PNU 120596 at times 13, 19, 25, 31, 37, 43, 49, and 55 min. **3** (20  $\mu$ M)  
5 7 4 co-applied with PNU 120596 (1  $\mu$ M) was incubated with the cells for 4 min at times 21 and 27 min. The  $\alpha$ -  
5 7 5 conotoxin ArIB[V11;V16D] (200 nM) co-applied with PNU 120596 (1  $\mu$ M) was incubated with the cells  
5 7 6 for 4 min at 39 min. This experiment was repeated twice (31-day old male mouse) with a total of about  
5 7 7 2,000 DRG neurons.

#### 5 7 8 **Constellation pharmacology of 3 on acetylcholine-induced depolarization in SCG neurons**

5 7 9 A ~15-s application of 20 mM KCl was done at the start of the calcium imaging experiment. This was  
5 8 0 followed by two consecutive ~15-s applications of acetylcholine (ACh, 300  $\mu$ M). After the second

5 8 1 application of ACh, the cells were incubated for 4 min with 0.2  $\mu$ M, 2  $\mu$ M, and 20  $\mu$ M of **3** at times 15, 21,  
5 8 2 and 27 min, respectively and with 1  $\mu$ M TxID at times 45 min, respectively. Each incubation with the test  
5 8 3 compounds was preceded and followed by a ~15-s application of ACh. This experiment was done twice on  
5 8 4 a 25- and 42-day old male mice with a total of about 1,000 neurons.

#### 5 8 5 **Single-cell transcriptomic analysis**

5 8 6 Experiments were performed as described previously (*Giacobassi, et al., 2020*). Briefly, individual cells  
5 8 7 were selected based upon their pharmacological response in the DRG assay, and then picked up with a fire-  
5 8 8 polished glass pipette. The cells were lysed, and messenger ribonucleic acid (mRNA) was reverse tran-  
5 8 9 scribed to generate complementary DNA (cDNA), which then underwent whole-transcriptome amplifica-  
5 9 0 tion, all using the QIAseq FX Single Cell RNA library kit according to the manufacturer's protocol (Qi-  
5 9 1 agen). The amplified cDNA was used to construct a sequencing library for the Illumina NGS platform also  
5 9 2 using the QIAseq FX kit. The amplified cDNA was fragmented to 300 bp in size, end repaired, and ligated  
5 9 3 to adapters. A final cleanup was performed with Agencourt AMPure XP magnetic beads (Beckman Coulter  
5 9 4 Life Sciences, Indianapolis, IN). The cDNA library was submitted to the Huntsman Cancer Institute High  
5 9 5 Throughput Genomics Shared Resource for library control and sequencing. Sequencing data were analyzed  
5 9 6 using in-house R scripts.

#### 5 9 7 **Calcium imaging with HEK-293 overexpressing GCaMP6s**

5 9 8 Calcium imaging experiments with HEK-293 (ATCC) overexpressing GCaMP6s (an ultrasensitive  
5 9 9 fluorescent protein calcium sensor) were used to assay P2Y1 activation. HEK-GCaMP6s cells were grown  
6 0 0 in DMEM:F12 (Invitrogen) containing 5% FBS, 0.3 mg/ml G418, and 1 $\times$  penicillin/streptomycin  
6 0 1 (Invitrogen). For calcium imaging experiments, HEK-GCaMP6s cells were subcultured into 1% gelatin-  
6 0 2 coated 96-well cell culture plates and grown to 80-90% confluence. Before imaging, the medium was  
6 0 3 replaced with LHC-9 medium (Invitrogen) containing 0.75 mM trypan red and, for antagonist treatment  
6 0 4 wells, the P2Y1 antagonist MRS2179 or molleamine C, and incubated for 30 min before assessing P2Y1  
6 0 5 activation. The agonist MRS2365, used to activate P2Y1, was prepared in LHC-9 at 3 $\times$  concentration and

6 0 6 added to cells at 37 °C as previously described (*Deering-Rice, et al., 2018; Lamb, et al., 2017*). Calcium  
6 0 7 flux was detected using a NOVOstar fluorescent plate reader (BMG Labtech).

#### 6 0 8 **Formalin test**

6 0 9 Male adult (6-8 weeks old; n = 8 per treatment group) C57BL/6 mice were placed in an observation chamber  
6 10 for approximately 10 min for habituation before the start of the test. Animals were pre-treated via intraper-  
6 11 itoneal (i.p.) injection with compound **3** (5, 20, and 30 mg/kg) or vehicle (DMSO-polyethylene glycol  
6 12 (PEG) 400-phosphate buffered saline (PBS)/1:6:13, 5 mL/kg) 10 min prior to formalin injection. Duloxe-  
6 13 tine (10 mg/kg, 10 mL/kg, i.p.) was used as a positive control drug and was administered 30 min before  
6 14 formalin injection. The mice then received intraplantar subcutaneous injection of 5 % formalin (in 30  $\mu$ L  
6 15 phosphate buffered saline solution) into the left hind paw and were placed immediately back in the obser-  
6 16 vation chamber. Formalin-evoked spontaneous nociceptive behaviors, including flinching, shaking, biting  
6 17 and licking of the injected paw in the mice, were then recorded for 0-60 min using a commercial camcorder.  
6 18 Nociceptive behaviors in the mice were scored using the recorded video files and assessed in the following  
6 19 bins: 0-5 minutes from early phase (Phase I) and 20-35 minutes from late phase (Phase II). Animals were  
6 20 euthanized immediately at the end of the study. Significance of drug effect versus vehicle were analyzed  
6 21 by one-way ANOVA and Dunnet's multiple comparisons test with Graphpad Prism 9.0.0 (Graphpad Soft-  
6 22 ware).

#### 6 23 ***In vitro* stability of **3** in mouse plasma**

6 24 Fresh whole blood was collected from mice via cardiac puncture and transferred into tubes pre-coated with  
6 25 0.12 M EDTA. Plasma was isolated from the whole blood by centrifugation at  $1,500 \times g$  for 10 min at 4  
6 26 °C and transferred into 1.5 mL microcentrifuge tubes. The plasma was preheated to 37 °C prior to the start  
6 27 of the study. The reactions were initiated by the addition of **3** dissolved in DMSO to 400  $\mu$ L of preheated  
6 28 plasma to yield final concentrations of **3** at 10, 30, and 100  $\mu$ M (final DMSO concentration = 0.5%). The  
6 29 experiments were performed in a dry bath incubator set at 37 °C, and the reaction for each concentration  
6 3 0 was conducted in triplicate. Samples (50  $\mu$ L) were taken at 0, 1, 4, 16, 24 h, added to 200  $\mu$ L MeOH, mixed

6 3 1 by vortexing for ~1 min and then centrifuged at  $19,000 \times g$  for 10 min at 4 °C. The clear supernatants were  
6 3 2 analyzed by UPLC-qTOF-MS as follows: an aliquot of the supernatant was diluted in methanol containing  
6 3 3 internal standard (40  $\mu$ L final volume), and 2  $\mu$ L were loaded onto an Acquity UPLC HSS T3 (1.8  $\mu$ m, 2.1  
6 3 4 mm  $\times$  100 mm) column. A linear gradient of 5%-100% CH<sub>3</sub>CN in H<sub>2</sub>O (0.1% formic acid) over 7 min at  
6 3 5 0.3 mL/min was used to elute the samples. The relative abundance of **3** at different time points was calcu-  
6 3 6 lated as normalized area under the curve with respect to internal standard leucine enkephalin.

$$6\ 3\ 7 \quad \text{Normalized area of } \mathbf{3} (X) = \frac{\text{Area under the curve of } \mathbf{3}}{\text{Area under the curve of internal standard}}$$

6 3 8 The percentage of **3** remaining in plasma at the individual time points relative to the 0 h sample was plotted  
6 3 9 versus incubation time (**Figure 7-figure supplement 1**). The approximate half-life for the compound was  
6 4 0 determined from the obtained graph, in which 50% of the compound remained.

#### 6 4 1 **Oocyte receptor expression and electrophysiological recordings**

6 4 2 Methods describing the preparation of cRNA encoding human, mouse, and rat nAChR subunits for expres-  
6 4 3 sion of nAChRs in *X. laevis* oocytes have been described in detail previously (Zheng, et al., 2020). *X.*  
6 4 4 *laevis* oocytes were microinjected with cRNA encoding the selected nAChR subunits. Oocytes were incu-  
6 4 5 bated at 17 °C for 1–3 days in ND96 prior to use. Injected oocytes were placed in a 30  $\mu$ L recording chamber  
6 4 6 and voltage clamped to a membrane potential of  $-70$  mV. ND96 (96.0 mM NaCl, 2.0 mM KCl, 1.8 mM  
6 4 7 CaCl<sub>2</sub>, 1.0 mM MgCl<sub>2</sub>, 5 mM HEPES, pH 7.5) with 0.1 mg/mL BSA was gravity perfused through the  
6 4 8 recording chamber at ~2 mL/min. A one second pulse of ACh was applied to measure the receptor response,  
6 4 9 with pulses occurring every minute. ACh was applied at a concentration of 100  $\mu$ M for all subtypes. A  
6 5 0 baseline ACh response was established, and then the ND96 control solution was switched to a ND96 solu-  
6 5 1 tion containing the various concentrations of compound **3** (0.67  $\mu$ M, 2  $\mu$ M, 6.7  $\mu$ M, 20  $\mu$ M). During per-  
6 5 2 fusion of the compound-containing solutions, ACh pulses continued once per minute to assess for block of  
6 5 3 the ACh-induced response. ACh responses were measured in the presence of a compound concentration  
6 5 4 until the responses reached steady state; an average of three of these responses compared to the baseline  
6 5 5 response was used to determine percent response. To estimate the IC<sub>50</sub> value for inhibition of the ACh

6 5 6 responses by **3**, the normalized data were analyzed by nonlinear regression and fit using a four-parameter  
6 5 7 logistic equation in Graphpad Prism 9.0.0 (Graphpad Software).

### 6 5 8 **Zebrafish photomotor response assay**

6 5 9 Zebrafish (*Danio rerio*) were obtained from the Centralized Zebrafish Animal Resource (CZAR) at the  
6 6 0 University of Utah. The zebrafish photomotor response assay to evaluate the effect of the compounds was  
6 6 1 performed as described previously with modifications (*Kokel, et al., 2010; Kokel and Peterson, 2011*).  
6 6 2 Briefly, larvae were loaded onto a 96-well plate format at 168 hours post fertilization, 10 fish per well with  
6 6 3 10 mM HEPES buffered E3 medium and transferred into a Zebrabox plate holder. Larval activity was  
6 6 4 tracked by using a Hamamatsu ORCA-ER camera mounted on a Nikon TE200 microscope with a 1× ob-  
6 6 5 jective. A 300 W xenon bulb housed in a Sutter Lambda LS illuminator was used to deliver light stimuli  
6 6 6 and elicit PMR. The robotic stage, digital video camera, and stimulus presentation were all automated via  
6 6 7 the Metamorph Software (Universal Imaging). All experiments consisted of three minutes of acclimatiza-  
6 6 8 tion in white light (pre-white light) followed by sample addition. The larvae were treated with the com-  
6 6 9 pounds by spiking each well with the specified treatment and then thoroughly mixed with a pipet. After  
6 7 0 sample addition, this was followed by 3 min of incubation with white light (post-white light), then 7 min  
6 7 1 strobe light (in dark and white light), 3 min in the dark and 3 min white light and strobe light after 1 h. After  
6 7 2 2 h, 7 min of strobe light, 3 min dark and 3 min white light.

### 6 7 3 **Mammalian cytotoxicity assay**

6 7 4 HEK-293 (ATCC CRL-1573) cells were cultured in Dulbecco's Modified Eagle Media (DMEM) supple-  
6 7 5 mented with 10 % fetal bovine serum (FBS), 100 units of penicillin and 100 µg/mL of streptomycin under  
6 7 6 a humidified environment with 5% CO<sub>2</sub>, 95% air at 37°C. Cells were seeded in 96-well plates at a density  
6 7 7 of 10000 cells/well and treated after 24 h with varying concentrations of the test sample, positive control,  
6 7 8 and the solvent control. After 72h, the media was removed and 15µL of 5mg/mL MTT reagent was added  
6 7 9 to each well. This was then incubated for 3 h at 37°C, 5% CO<sub>2</sub>, and 95% air before addition of 100 µL  
6 8 0 DMSO. The absorbance was read at 570 nm using a microplate reader (Biotek Synergy HT). IC<sub>50</sub> values

6 8 1 were then calculated using GraphPad Prism 9.0.0 based on a four-point sigmoidal nonlinear regression  
6 8 2 analysis of cell viability vs log concentration of test sample.

6 8 3

#### 6 8 4 **ACKNOWLEDGEMENTS**

6 8 5 This work was funded by DOD W81XWH-17-1-0413, except for the tunicate metabolomic analysis, which  
6 8 6 was funded by NIH R35GM122521 to EWS, and electrophysiology experiments, which were funded by  
6 8 7 NIH R35GM136430 to JMM. Assistance from the Ministry of Environment, Climate Change, Disaster  
6 8 8 Management, and Meteorology (Solomon Islands) and Solomon Islands National University is gratefully  
6 8 9 acknowledged. We thank the ALSAM Foundation for supporting equipment acquisition.

6 9 0

#### 6 9 1 **ADDITIONAL INFORMATION**

##### 6 9 2 **Competing Interests**

6 9 3 The authors declare no competing interests.

6 9 4

##### 6 9 5 **Funding**

| <b>Funder</b>                                                                                                                    | <b>Grant reference number</b> | <b>Author</b>                                                                                            |
|----------------------------------------------------------------------------------------------------------------------------------|-------------------------------|----------------------------------------------------------------------------------------------------------|
| The United States Department of Defense                                                                                          | DOD W81XWH-17-1-0413          | Christopher A. Reilly<br>Alan R. Light<br>J. Michael McIntosh<br>Baldomero M. Olivera<br>Eric W. Schmidt |
| National Institutes of Health                                                                                                    | NIH R35GM122521               | Eric W. Schmidt                                                                                          |
| National Institutes of Health                                                                                                    | NIH R35GM136430               | J. Michael McIntosh                                                                                      |
| The funders had no role in study design, data collection and interpretation, or the decision to submit the work for publication. |                               |                                                                                                          |

6 9 6

##### 6 9 7 **Author Contributions**

6 9 8 E.W.S. and B.M.O. designed the study; N.D.P., L.S.L, J.O.T., Z.L., K.C., C.D., C.E.D-R., A.L.L., M.K.,

6 9 9 R.W.H., J.Z. performed experiments and analyzed data. All authors contributed to manuscript preparation.

7 0 0 The authors declare no conflicts of interest.

7 0 1

7 0 2    **ADDITIONAL FILES**

7 0 3    Supplementary figures and tables.

7 0 4

7 0 5    **REFERENCES**

7 0 6    Aráoz R, Ouanounou G, Iorga BI, Goudet A, Alili D, Amar M, Benoit E, Molgó J, & Servent D. 2015. The  
7 0 7        neurotoxic effect of 13,19-didesmethyl and 13-desmethyl spirolide C phycotoxins Is mainly  
7 0 8        mediated by nicotinic rather than muscarinic acetylcholine receptors. *Toxicological Sciences* **147**:  
7 0 9        156-167. DOI:10.1093/toxsci/kfv119

7 1 0    Bjørn-Yoshimoto WE, Ramiro IBL, Yandell M, McIntosh JM, Olivera BM, Ellgaard L, & Safavi-Hemami  
7 1 1        H. 2020. Curses or cures: A review of the numerous benefits versus the biosecurity concerns of  
7 1 2        conotoxin research. *Biomedicines* **8**: 235. DOI:10.3390/biomedicines8080235

7 1 3    Bosse GD, Urcino C, Watkins M, Flórez Salcedo P, Kozel S, Chase K, Cabang A, Espino SS, Safavi-  
7 1 4        Hemami H, Raghuraman S, Olivera BM, Peterson RT, & Gajewiak J. 2021. Discovery of a potent  
7 1 5        conorfamide from *Conus episcopatus* using a novel zebrafish larvae assay. *Journal of Natural*  
7 1 6        *Products*. DOI:10.1021/acs.jnatprod.0c01297

7 1 7    Christensen SB, Hone AJ, Roux I, Kniazeff J, Pin J-P, Upert G, Servent D, Glowatzki E, & McIntosh JM.  
7 1 8        2017. RgIA4 potently blocks mouse  $\alpha 9\alpha 10$  nAChRs and provides long lasting protection against  
7 1 9        oxaliplatin-induced cold allodynia. *Frontiers in Cellular Neuroscience* **11**: 219.  
7 2 0        DOI:10.3389/fncel.2017.00219

7 2 1    Cimino G, & Ghiselin MT. 2009. *Chemical defense and the evolution of opisthobranch gastropods* (Vol.  
7 2 2        60). San Francisco, Ca: California Academy of Sciences.

7 2 3    Cucchiaro G, Xiao Y, Gonzalez-Sulser A, & Kellar Kenneth J. 2008. Analgesic effects of sazetidine-A, a  
7 2 4        new    nicotinic    cholinergic    drug. *Anesthesiology*    **109**:    512-519.  
7 2 5        DOI:10.1097/ALN.0b013e3181834490

- 7 26 Culver P, Fenical W, & Taylor P. 1984. Lophotoxin irreversibly inactivates the nicotinic acetylcholine  
7 27 receptor by preferential association at one of the two primary agonist sites. *Journal of Biological*  
7 28 *Chemistry* **259**: 3763-3770. DOI:10.1016/S0021-9258(17)43160-7
- 7 29 Deering-Rice CE, Nguyen N, Lu Z, Cox JE, Shapiro D, Romero EG, Mitchell VK, Burrell KL, Veranth  
7 30 JM, & Reilly CA. 2018. Activation of TRPV3 by wood smoke particles and roles in  
7 31 pneumotoxicity. *Chemical Research in Toxicology* **31**: 291-301.  
7 32 DOI:10.1021/acs.chemrestox.7b00336
- 7 33 Dhandapani R, Arokiaraj CM, Taberner FJ, Pacifico P, Raja S, Nocchi L, Portulano C, Franciosa F, Maffei  
7 34 M, Hussain AF, de Castro Reis F, Reymond L, Perlas E, Garcovich S, Barth S, Johnsson K, Lechner  
7 35 SG, & Heppenstall PA. 2018. Control of mechanical pain hypersensitivity in mice through ligand-  
7 36 targeted photoablation of TrkB-positive sensory neurons. *Nature Communications* **9**: 1640-1640.  
7 37 DOI:10.1038/s41467-018-04049-3
- 7 38 Folmer O, Black M, Hoeh W, Lutz R, & Vrijenhoek R. 1994. DNA primers for amplification of  
7 39 mitochondrial cytochrome c oxidase subunit I from diverse metazoan invertebrates. *Molecular*  
7 40 *Marine Biology and Biotechnology* **3**: 294-299.
- 7 41 Fu K-Y, Light AR, & Maixner W. 2001. Long-lasting inflammation and long-term hyperalgesia after  
7 42 subcutaneous formalin injection into the rat hindpaw. *The Journal of Pain* **2**: 2-11.  
7 43 DOI:10.1054/jpai.2001.9804
- 7 44 Giacobassi MJ, Leavitt LS, Raghuraman S, Alluri R, Chase K, Finol-Urdaneta RK, Terlau H, Teichert RW,  
7 45 & Olivera BM. 2020. An integrative approach to the facile functional classification of dorsal root  
7 46 ganglion neuronal subclasses. *Proceedings of the National Academy of Sciences of the United*  
7 47 *States of America* **117**: 5494-5501. DOI:10.1073/pnas.1911382117
- 7 48 Hamouda AK, Wang Z-J, Stewart DS, Jain AD, Glennon RA, & Cohen JB. 2015. Desformylflustrabromine  
7 49 (dFBr) and [<sup>3</sup>H]dFBr-labeled binding sites in a nicotinic acetylcholine receptor. *Molecular*  
7 50 *Pharmacology* **88**: 1-11. DOI:10.1124/mol.115.098913



- 7 5 1 Hirose M, Nozawa Y, & Hirose E. 2010. Genetic isolation among morphotypes in the photosymbiotic  
7 5 2 didemnid *Didemnum molle* (Ascidiacea, Tunicata) from the Ryukyus and Taiwan. *Zoological*  
7 5 3 *Science* **27**: 959-964. DOI:10.2108/zsj.27.959
- 7 5 4 Hirose M, Yokobori S, & Hirose E. 2009. Potential speciation of morphotypes in the photosymbiotic  
7 5 5 ascidian *Didemnum molle* in the Ryukyu Archipelago, Japan. *Coral Reefs* **28**: 119-126.  
7 5 6 DOI:10.1007/s00338-008-0425-0
- 7 5 7 Hone AJ, Meyer EL, McIntyre M, & McIntosh JM. 2012. Nicotinic acetylcholine receptors in dorsal root  
7 5 8 ganglion neurons include the  $\alpha 6\beta 4^*$  subtype. *FASEB Journal : Official Publication of the*  
7 5 9 *Federation of American Societies for Experimental Biology* **26**: 917-926. DOI:10.1096/fj.11-  
7 6 0 195883
- 7 6 1 Hone AJ, Rueda-Ruzafa L, Gordon TJ, Gajewiak J, Christensen S, Dyhring T, Albillos A, & McIntosh JM.  
7 6 2 2020. Expression of  $\alpha 3\beta 2\beta 4$  nicotinic acetylcholine receptors by rat adrenal chromaffin cells  
7 6 3 determined using novel conopeptide antagonists. *Journal of Neurochemistry* **154**: 158-176.  
7 6 4 DOI:10.1111/jnc.14966
- 7 6 5 Hone AJ, Talley TT, Bobango J, Huidobro Melo C, Hararah F, Gajewiak J, Christensen S, Harvey PJ, Craik  
7 6 6 DJ, & McIntosh JM. 2018. Molecular determinants of  $\alpha$ -conotoxin potency for inhibition of human  
7 6 7 and rat  $\alpha 6\beta 4$  nicotinic acetylcholine receptors. *Journal of Biological Chemistry* **293**: 17838-17852.  
7 6 8 DOI:10.1074/jbc.RA118.005649
- 7 6 9 Hunskaar S, & Hole K. 1987. The formalin test in mice: dissociation between inflammatory and non-  
7 7 0 inflammatory pain. *Pain* **30**: 103-114. DOI:10.1016/0304-3959(87)90088-1
- 7 7 1 Issac M, Aknin M, Gauvin-Bialecki A, Pond CD, Barrows LR, Kashman Y, & Carmeli S. 2017.  
7 7 2 Mollecarbamates, molleureas, and molledihydroisoquinolone, o-carboxyphenethylamide  
7 7 3 metabolites of the ascidian *Didemnum molle* collected in Madagascar. *Journal of Natural Products*  
7 7 4 **80**: 1844-1852. DOI:10.1021/acs.jnatprod.7b00123

- 7 7 5 Jackson M, & Tourtellotte W. 2014. Neuron culture from mouse superior cervical ganglion. *Bio-protocol*  
7 7 6 4: e1035. DOI:10.21769/bioprotoc.1035
- 7 7 7 Jones TR, Kang IH, Wheeler DB, Lindquist RA, Papallo A, Sabatini DM, Golland P, & Carpenter AE.  
7 7 8 2008. CellProfiler analyst: data exploration and analysis software for complex image-based  
7 7 9 screens. *BMC Bioinformatics* 9: 482. DOI:10.1186/1471-2105-9-482
- 7 8 0 Kasheverov IE, Shelukhina IV, Kudryavtsev DS, Makarieva TN, Spirova EN, Guzii AG, Stonik VA, &  
7 8 1 Tsetlin VI. 2015. 6-Bromohypaphorine from marine nudibranch mollusk *Hermissenda crassicornis*  
7 8 2 is an agonist of human alpha-7 nicotinic acetylcholine receptor. *Marine Drugs* 13: 1255-1266.  
7 8 3 DOI:10.3390/md13031255
- 7 8 4 Kokel D, Bryan J, Laggner C, White R, Cheung CYJ, Mateus R, Healey D, Kim S, Werdich AA, Haggarty  
7 8 5 SJ, MacRae CA, Shoichet B, & Peterson RT. 2010. Rapid behavior-based identification of  
7 8 6 neuroactive small molecules in the zebrafish. *Nature Chemical Biology* 6: 231-237.  
7 8 7 DOI:10.1038/nchembio.307
- 7 8 8 Kokel D, & Peterson RT. 2011. Using the zebrafish photomotor response for psychotropic drug screening.  
7 8 9 *Methods in Cell Biology* 105: 517-524. DOI:10.1016/B978-0-12-381320-6.00022-9
- 7 9 0 Kudryavtsev D, Makarieva T, Utkina N, Santalova E, Kryukova E, Methfessel C, Tsetlin V, Stonik V, &  
7 9 1 Kasheverov I. 2014. Marine natural products acting on the acetylcholine-binding protein and  
7 9 2 nicotinic receptors: from computer modeling to binding studies and electrophysiology. *Marine*  
7 9 3 *Drugs* 12: 1859-1875. DOI:10.3390/md12041859
- 7 9 4 Lamb JG, Romero EG, Lu Z, Marcus SK, Peterson HC, Veranth JM, Deering-Rice CE, & Reilly CA. 2017.  
7 9 5 Activation of human transient receptor potential melastatin-8 (TRPM8) by calcium-rich particulate  
7 9 6 materials and effects on human lung cells. *Molecular Pharmacology* 92: 653-664.  
7 9 7 DOI:10.1124/mol.117.109959
- 7 9 8 Light AR, Hughen RW, Zhang J, Rainier J, Liu Z, & Lee J. 2008. Dorsal root ganglion neurons innervating  
7 9 9 skeletal muscle respond to physiological combinations of protons, ATP, and lactate mediated by

- 8 0 0 ASIC, P2X, and TRPV1. *Journal of Neurophysiology* **100**: 1184-1201.  
8 0 1 DOI:10.1152/jn.01344.2007
- 8 0 2 Limapichat W, Dougherty DA, & Lester HA. 2014. Subtype-specific mechanisms for functional interaction  
8 0 3 between  $\alpha 6\beta 4^*$  nicotinic acetylcholine receptors and P2X receptors. *Molecular Pharmacology* **86**:  
8 0 4 263-274. DOI:10.1124/mol.114.093179
- 8 0 5 Lin Z, Antemano RR, Huguen RW, Tianero MDB, Peraud O, Haygood MG, Concepcion GP, Olivera BM,  
8 0 6 Light A, & Schmidt EW. 2010. Pulicatin A–E, neuroactive thiazoline metabolites from cone snail-  
8 0 7 associated bacteria. *Journal of Natural Products* **73**: 1922-1926. DOI:10.1021/np100588c
- 8 0 8 Lin Z, Reilly CA, Antemano R, Huguen RW, Marett L, Concepcion GP, Haygood MG, Olivera BM, Light  
8 0 9 A, & Schmidt EW. 2011. Nobilamides A-H, long-acting transient receptor potential vanilloid-1  
8 1 0 (TRPV1) antagonists from mollusk-associated bacteria. *Journal of Medicinal Chemistry* **54**: 3746-  
8 1 1 3755. DOI:10.1021/jm101621u
- 8 1 2 Lin Z, Smith MD, Concepcion GP, Haygood MG, Olivera BM, Light A, & Schmidt EW. 2017. Modulating  
8 1 3 the serotonin receptor spectrum of pulicatin natural products. *Journal of Natural Products* **80**:  
8 1 4 2360-2370. DOI:10.1021/acs.jnatprod.7b00317
- 8 1 5 Loram LC, Taylor FR, Strand KA, Maier SF, Speake JD, Jordan KG, James JW, Wene SP, Pritchard RC,  
8 1 6 Green H, Van Dyke K, Mazarov A, Letchworth SR, & Watkins LR. 2012. Systemic administration  
8 1 7 of an alpha-7 nicotinic acetylcholine agonist reverses neuropathic pain in male Sprague Dawley  
8 1 8 rats. *Journal of Pain* **13**: 1162-1171. DOI:10.1016/j.jpain.2012.08.009
- 8 1 9 Lu W, Reigada D, Sévigny J, & Mitchell CH. 2007. Stimulation of the P2Y1 receptor up-regulates  
8 2 0 nucleoside-triphosphate diphosphohydrolase-1 in human retinal pigment epithelial cells. *Journal*  
8 2 1 *of Pharmacology and Experimental Therapeutics* **323**: 157-164. DOI:10.1124/jpet.107.124545
- 8 2 2 Lu Z, Harper MK, Pond CD, Barrows LR, Ireland CM, & Van Wagoner RM. 2012. Thiazoline peptides  
8 2 3 and a tris-phenethyl urea from *Didemnum molle* with anti-HIV activity. *Journal of Natural*  
8 2 4 *Products* **75**: 1436-1440. DOI:10.1021/np300270p

- 8 25 Luo S, Zhangsun D, Zhu X, Wu Y, Hu Y, Christensen S, Harvey PJ, Akcan M, Craik DJ, & McIntosh JM.  
8 26 2013. Characterization of a novel  $\alpha$ -conotoxin TxID from *Conus textile* that potently blocks rat  
8 27  $\alpha 3\beta 4$  nicotinic acetylcholine receptors. *Journal of Medicinal Chemistry* **56**: 9655-9663.  
8 28 DOI:10.1021/jm401254c
- 8 29 McNamara CR, Mandel-Brehm J, Bautista DM, Siemens J, Deranian KL, Zhao M, Hayward NJ, Chong  
8 3 0 JA, Julius D, Moran MM, & Fanger CM. 2007. TRPA1 mediates formalin-induced pain.  
8 3 1 *Proceedings of the National Academy of Sciences of the United States of America* **104**: 13525-  
8 3 2 13530. DOI:10.1073/pnas.0705924104
- 8 3 3 Memon T, Chase K, Leavitt LS, Olivera BM, & Teichert RW. 2017. TRPA1 expression levels and  
8 3 4 excitability brake by KV channels influence cold sensitivity of TRPA1-expressing neurons.  
8 3 5 *Neuroscience* **353**: 76-86. DOI:10.1016/j.neuroscience.2017.04.001
- 8 3 6 Memon T, Yarishkin O, Reilly CA, Krizaj D, Olivera BM, & Teichert RW. 2019. Trans-anethole of fennel  
8 3 7 oil is a selective and non-electrophilic agonist of the TRPA1 ion channel. *Molecular*  
8 3 8 *Pharmacology*: 433-441. DOI:10.1124/mol.118.114561
- 8 3 9 Raghuraman S, Xie JY, Giacobassi MJ, Tun JO, Chase K, Lu D, Teichert RW, Porreca F, & Olivera BM.  
8 4 0 2020. Chronicling changes in the somatosensory neurons after peripheral nerve injury. *Proceedings*  
8 4 1 *of the National Academy of Sciences of the United States of America* **117**: 26414-26421.  
8 4 2 DOI:10.1073/pnas.1922618117
- 8 4 3 Romero HK, Christensen SB, Di Cesare Mannelli L, Gajewiak J, Ramachandra R, Elmslie KS, Vetter DE,  
8 4 4 Ghelardini C, Iadonato SP, Mercado JL, Olivera BM, & McIntosh JM. 2017. Inhibition of  $\alpha 9\alpha 10$   
8 4 5 nicotinic acetylcholine receptors prevents chemotherapy-induced neuropathic pain. *Proceedings of*  
8 4 6 *the National Academy of Sciences of the United States of America* **114**: E1825-E1832.  
8 4 7 DOI:10.1073/pnas.1621433114

- 8 4 8 Shannon P, Markiel A, Ozier O, Baliga NS, Wang JT, Ramage D, Amin N, Schwikowski B, & Ideker T.  
8 4 9 2003. Cytoscape: a software environment for integrated models of biomolecular interaction  
8 5 0 networks. *Genome Research* **13**: 2498-2504. DOI:10.1101/gr.1239303
- 8 5 1 Simeone X, Karch R, Ciuraszkiewicz A, Orr-Urtreger A, Lemmens-Gruber R, Scholze P, & Huck S. 2019.  
8 5 2 The role of the nAChR subunits  $\alpha 5$ ,  $\beta 2$ , and  $\beta 4$  on synaptic transmission in the mouse superior  
8 5 3 cervical ganglion. *Physiological reports* **7**: e14023-e14023. DOI:10.14814/phy2.14023
- 8 5 4 Smith NJ, Hone AJ, Memon T, Bossi S, Smith TE, McIntosh JM, Olivera BM, & Teichert RW. 2013.  
8 5 5 Comparative functional expression of nAChR subtypes in rodent DRG neurons. *Frontiers in*  
8 5 6 *Cellular Neuroscience* **7**: 225-225. DOI:10.3389/fncel.2013.00225
- 8 5 7 Tan KC, Wakimoto T, Takada K, Ohtsuki T, Uchiyama N, Goda Y, & Abe I. 2013. Cycloforskamide, a  
8 5 8 cytotoxic macrocyclic peptide from the sea slug *Pleurobranchus forskalii*. *Journal of Natural*  
8 5 9 *Products* **76**: 1388-1391. DOI:10.1021/np400404r
- 8 6 0 Teichert RW, Memon T, Aman JW, & Olivera BM. 2014. Using constellation pharmacology to define  
8 6 1 comprehensively a somatosensory neuronal subclass. *Proceedings of the National Academy of*  
8 6 2 *Sciences of the United States of America* **111**: 2319-2324. DOI:10.1073/pnas.1324019111
- 8 6 3 Teichert RW, Schmidt EW, & Olivera BM. 2015. Constellation pharmacology: A new paradigm for drug  
8 6 4 discovery. *Annual Review of Pharmacology and Toxicology* **55**: 573-589. DOI:10.1146/annurev-  
8 6 5 pharmtox-010814-124551
- 8 6 6 Teichert RW, Smith NJ, Raghuraman S, Yoshikami D, Light AR, & Olivera BM. 2012. Functional profiling  
8 6 7 of neurons through cellular neuropharmacology. *Proceedings of the National Academy of Sciences*  
8 6 8 *of the United States of America* **109**: 1388-1395. DOI:10.1073/pnas.1118833109
- 8 6 9 Tjølsen A, Berge OG, Hunskaar S, Rosland JH, & Hole K. 1992. The formalin test: an evaluation of the  
8 7 0 method. *Pain* **51**: 5-17. DOI:10.1016/0304-3959(92)90003-t
- 8 7 1 Toll L, Zaveri NT, Polgar WE, Jiang F, Khroyan TV, Zhou W, Xie XS, Stauber GB, Costello MR, & Leslie  
8 7 2 FM. 2012. AT-1001: a high affinity and selective  $\alpha 3\beta 4$  nicotinic acetylcholine receptor antagonist

- 8 7 3 blocks nicotine self-administration in rats. *Neuropsychopharmacology* **37**: 1367-1376.  
8 7 4 DOI:10.1038/npp.2011.322
- 8 7 5 Tsuneki H, You YR, Toyooka N, Sasaoka T, Nemoto H, Dani JA, & Kimura I. 2005. Marine alkaloids (-)-  
8 7 6 pictamine and (-)-lepadin B block neuronal nicotinic acetylcholine receptors. *Biological and*  
8 7 7 *Pharmaceutical Bulletin* **28**: 611-614. DOI:10.1248/bpb.28.611
- 8 7 8 Volkow ND, & McLellan AT. 2016. Opioid abuse in chronic pain — Misconceptions and mitigation  
8 7 9 strategies. *New England Journal of Medicine* **374**: 1253-1263. DOI:10.1056/NEJMra1507771
- 8 8 0 Wakimoto T, Tan KC, & Abe I. 2013. Ergot alkaloid from the sea slug *Pleurobranchus forskalii*. *Toxicon*  
8 8 1 **72**: 1-4. DOI:10.1016/j.toxicon.2013.05.021
- 8 8 2 Wang M, Carver JJ, Phelan VV, Sanchez LM, Garg N, Peng Y, Nguyen DD, Watrous J, Kapon CA,  
8 8 3 Luzzatto-Knaan T, Porto C, Bouslimani A, Melnik AV, Meehan MJ, Liu W-T, Crüsemann M,  
8 8 4 Boudreau PD, Esquenazi E, Sandoval-Calderón M, Kersten RD, Pace LA, Quinn RA, Duncan KR,  
8 8 5 Hsu C-C, Floros DJ, Gavilan RG, Kleigrew K, Northen T, Dutton RJ, Parrot D, Carlson EE, Aigle  
8 8 6 B, Michelsen CF, Jelsbak L, Sohlenkamp C, Pevzner P, Edlund A, McLean J, Piel J, Murphy BT,  
8 8 7 Gerwick L, Liaw C-C, Yang Y-L, Humpf H-U, Maansson M, Keyzers RA, Sims AC, Johnson AR,  
8 8 8 Sidebottom AM, Sedio BE, Klitgaard A, Larson CB, Boya P CA, Torres-Mendoza D, Gonzalez  
8 8 9 DJ, Silva DB, Marques LM, Demarque DP, Pociute E, O'Neill EC, Briand E, Helfrich EJN,  
8 9 0 Granatosky EA, Glukhov E, Ryffel F, Houson H, Mohimani H, Kharbush JJ, Zeng Y, Vorholt JA,  
8 9 1 Kurita KL, Charusanti P, McPhail KL, Nielsen KF, Vuong L, Elfeki M, Traxler MF, Engene N,  
8 9 2 Koyama N, Vining OB, Baric R, Silva RR, Mascuch SJ, Tomasi S, Jenkins S, Macherla V,  
8 9 3 Hoffman T, Agarwal V, Williams PG, Dai J, Neupane R, Gurr J, Rodríguez AMC, Lamsa A, Zhang  
8 9 4 C, Dorrestein K, Duggan BM, Almaliti J, Allard P-M, Phapale P, Nothias L-F, Alexandrov T,  
8 9 5 Litaudon M, Wolfender J-L, Kyle JE, Metz TO, Peryea T, Nguyen D-T, VanLeer D, Shinn P,  
8 9 6 Jadhav A, Müller R, Waters KM, Shi W, Liu X, Zhang L, Knight R, Jensen PR, Palsson BØ,  
8 9 7 Pogliano K, Linington RG, Gutiérrez M, Lopes NP, Gerwick WH, Moore BS, Dorrestein PC, &

- 8 9 8           Bandeira N. 2016. Sharing and community curation of mass spectrometry data with Global Natural  
8 9 9           Products Social Molecular Networking. *Nature Biotechnology* **34**: 828-837. DOI:10.1038/nbt.3597
- 9 0 0   Wesson KJ, & Hamann MT. 1996. Keenamide A, a bioactive cyclic peptide from the marine mollusk  
9 0 1           Pleurobranchus forskalii. *Journal of Natural Products* **59**: 629-631. DOI:10.1021/np960153t
- 9 0 2   Wonnacott S, & Gallagher T. 2006. The chemistry and pharmacology of anatoxin-a and related  
9 0 3           homotropanes with respect to nicotinic acetylcholine receptors. *Marine Drugs* **4**: 228-254.  
9 0 4           DOI:10.3390/md403228
- 9 0 5   Wood SA, Taylor DI, McNabb P, Walker J, Adamson J, & Cary SC. 2012. Tetrodotoxin concentrations in  
9 0 6           Pleurobranchaea maculata: Temporal, spatial and individual variability from New Zealand  
9 0 7           populations. *Marine Drugs* **10**: 163-176. DOI:10.3390/md10010163
- 9 0 8   Yuan M, Malagon AM, Yasuda D, Belluzzi JD, Leslie FM, & Zaveri NT. 2017. The  $\alpha 3\beta 4$  nAChR partial  
9 0 9           agonist AT-1001 attenuates stress-induced reinstatement of nicotine seeking in a rat model of  
9 1 0           relapse and induces minimal withdrawal in dependent rats. *Behavioural Brain Research* **333**: 251-  
9 1 1           257. DOI:10.1016/j.bbr.2017.07.004
- 9 1 2   Zheng N, Christensen SB, Blakely A, Dowell C, Purushottam L, McIntosh JM, & Chou DH-C. 2020.  
9 1 3           Development of conformationally constrained  $\alpha$ -RgIA analogues as stable peptide antagonists of  
9 1 4           human  $\alpha 9\alpha 10$  nicotinic acetylcholine receptors. *Journal of Medicinal Chemistry* **63**: 8380-8387.  
9 1 5           DOI:10.1021/acs.jmedchem.0c00613
- 9 1 6   Zheng Y, Liu P, Bai L, Trimmer JS, Bean BP, & Ginty DD. 2019. Deep sequencing of somatosensory  
9 1 7           neurons reveals molecular determinants of intrinsic physiological properties. *Neuron* **103**: 598-  
9 1 8           616.e597. DOI:10.1016/j.neuron.2019.05.039
- 9 1 9   Zwart R, & Vijverberg HPM. 1997. Potentiation and inhibition of neuronal nicotinic receptors by atropine:  
9 2 0           Competitive and noncompetitive effects. *Molecular Pharmacology* **52**: 886-895.  
9 2 1           DOI:10.1124/mol.52.5.886
- 9 2 2
